# Water as a reactant in the differential expression of proteins in cancer

Jeffrey M. Dick<sup>1,\*</sup> 

<sup>1</sup> Key Laboratory of Metallogenic Prediction of Nonferrous Metals and Geological Environment Monitoring, Ministry of Education, School of Geosciences and Info-Physics, Central South University, Changsha, China

\* Correspondence: jeff@chnosz.net

Preprint compiled on June 3, 2020

1 **Abstract:** How the abundances of proteins are shaped by tumor microenvironments, such as hypoxic  
2 conditions and higher water content compared to normal tissues, is an important question for cancer  
3 biochemistry. Compositional analysis of more than 250 datasets for differentially expressed proteins  
4 compiled from the literature reveals a higher stoichiometric hydration state in multiple cancer types  
5 compared to normal tissue; this trend is also evident in pan-cancer transcriptomic and proteomic  
6 datasets from The Cancer Genome Atlas and Human Protein Atlas. These findings support the notion  
7 of a basic physicochemical link between increased water content in tumors and the patterns of gene  
8 and protein expression in cancer. The generally increased hydration state is juxtaposed with a wide  
9 spectrum of carbon oxidation states of differentially expressed proteins, which may be associated  
10 with different gene ages, host tissue properties and metabolic features of specific cancer types.

11 **Keywords:** proteomes; chemical composition; water content; hypoxia; 3D cell culture; proliferation

---

## 12 1. Introduction

13 Although cancer is usually regarded as being driven primarily by genetic mutations [1], alterations  
14 in cancer cell metabolism and tumor microenvironment are also crucial for the growth of cancer cells.  
15 Together with extracellular acidosis due to increased glycolysis [2], changes in water and oxygen  
16 content are major chemical characteristics of cancer. Hypoxia, or less than normal physiological  
17 concentration of oxygen, in tumor microenvironments plays a major role in the biochemistry,  
18 physiology and progression of cancer [3]. Cancer tissue also has a relatively high water content  
19 [4], as consistently demonstrated by early desiccation experiments [5]. More recent developments of  
20 spectroscopic methods further substantiate the generally higher water content of cancer tissue [6,7].  
21 These observations are consistent with the hypothesis that higher cellular hydration in carcinogenesis  
22 is a major factor that is shared with embryonic conditions [8]. Moreover, water content is a key player  
23 in other aspects of cell biology such as entry into dormancy [9]. Nonetheless, the connections between  
24 cellular water content and biomolecular abundances are not well understood.

25 Differences in the abundances of many proteins are a major outcome of the combination of genetic,  
26 microenvironmental and metabolic alterations in cancer. In a genocentric view of metabolism, the  
27 myriad reactions underlying changes to the proteome are catalyzed and regulated by the enzymatic  
28 products of the genome, but an adequate biochemical description should also account for the chemical  
29 compositions of the proteins themselves. From a geochemical perspective, a natural question to  
30 ask is whether the chemical compositions of differentially expressed proteins are shaped by the  
31 physicochemical conditions of tumor microenvironments.

32 In addition to the altered oxygenation and hydration status of tumors, the observation  
33 that most biochemical transformations involve some combination of oxidation-reduction and  
34 hydration-dehydration reactions [10,11] leads to the hypothesis that changes of oxidation and  
35 hydration state of biomolecules constitute primary biochemical variables. The sensitivity of metabolic  
36 reactions to hypoxia is well documented; for example, the reduction of metabolites under hypoxic  
37 conditions is possible by running the TCA cycle in reverse [12], and hypoxic regions in tumors  
38 accelerate the reduction of nitroxide, a redox-sensitive contrast agent used in magnetic resonance

39 imaging [13,14]. However, hypoxia also induces the mitochondrial production of reactive oxygen  
40 species [15], so it would be an oversimplification to state that hypoxia leads to uniformly more reducing  
41 intracellular conditions. Cellular hydration state also has wide-ranging effects on cell metabolism [16],  
42 but no previous studies have systematically characterized chemical metrics of oxidation and hydration  
43 state at the proteome level in cancer.

44 In a short section on “Water as a Reactant”, a popular biochemistry textbook [17] describes a  
45 few types of reactions involving the release of H<sub>2</sub>O as a product (oxidation of glucose, condensation  
46 reactions) or its consumption as a reactant (water splitting in photosynthesis, and hydrolysis, the  
47 reverse of condensation). The polymerization of amino acids is a type of condensation reaction that  
48 is fundamental to protein synthesis, but the stoichiometry of the reactions depends only on protein  
49 length; one water is lost for each peptide bond formed between any two amino acids. A more specific  
50 metric is needed to quantify the amount of H<sub>2</sub>O gained or lost in the differential expression of proteins  
51 with different amino acid compositions.

52 Without considering detailed biosynthetic mechanisms, it is possible to use compositional metrics,  
53 which are derived from the elemental composition of proteins, to quantify the net differences in  
54 the degree of oxidation (oxidation state) and hydration (hydration state) between distinct proteins.  
55 An important theoretical consideration in deriving these metrics is that, unlike oxidation-reduction  
56 reactions, hydration-dehydration reactions do not involve the transfer of electrons, that is, they  
57 are redox-neutral. This reasoning underlies the development of a compositional metric called the  
58 stoichiometric hydration state [18]. Combined with calculations of carbon oxidation state, this makes  
59 it possible to quantify compositional differences of proteins in two dimensions that are predicted to be  
60 independent indicators of environmental oxygen and water content.

61 My previous analysis of proteomic data provided preliminary evidence for a higher hydration  
62 state of proteomes in colorectal and pancreatic cancer [19]. That compilation of differential expression  
63 data is expanded here to include breast, liver, lung and prostate cancer. Proteomic data are also  
64 considered for laboratory experiments of hypoxia, because of its relevance to cancer [3], and  
65 hyperosmotic stress, which has not been reported for cancer cell lines, but permits testing the  
66 sensitivity of the compositional analysis to changes in hydration state. Furthermore, I separately  
67 analyze proteomic data for both cellular and secreted proteins in hypoxia compared to normoxic  
68 controls. I also consider differential expression data for 3D culture conditions; compared to 2D or  
69 monolayer growth, the formation of cell aggregates, spheroids, or organoids in 3D culture more closely  
70 represents the tissue environment [20,21]. Finally, I combine the differential expression data with gene  
71 ages to get a picture of the evolutionary trajectories of chemical composition.

72 By analyzing the chemical compositions derived from proteomic datasets for particular cancer  
73 types and cell culture conditions, as well as pan-cancer transcriptomic and proteomic data, I show that  
74 hyperosmotic and 3D culture conditions in laboratory experiments induce the expression of proteins  
75 with an overall lower hydration state, whereas a higher hydration state characterizes the populations of  
76 proteins that are up-regulated in most cancer types. Therefore, the differential expression of proteins in  
77 most cancer types can be characterized theoretically as an overall biochemical reaction that consumes  
78 water as a reactant; this may be a novel biochemical manifestation of the generally elevated water  
79 content in tumors. In contrast, different cancer types show a wide range of carbon oxidation states of  
80 differentially expressed proteins, which therefore do not appear to be driven by the general condition  
81 of tumor hypoxia. Instead, the changes in oxidation state can be correlated with gene ages and might  
82 be associated with specific tissue and metabolic characteristics of different cancer types.

## 83 2. Results

84 Extensive literature searches were performed to build a database of differentially expressed  
85 proteins in five cell culture conditions versus controls and primary cancers of six organs compared to  
86 normal tissue (Fig. 1). Multiple datasets for each condition and cancer type were considered in order  
87 to compensate for inevitable technical and biological variability. In total, 301 datasets were obtained

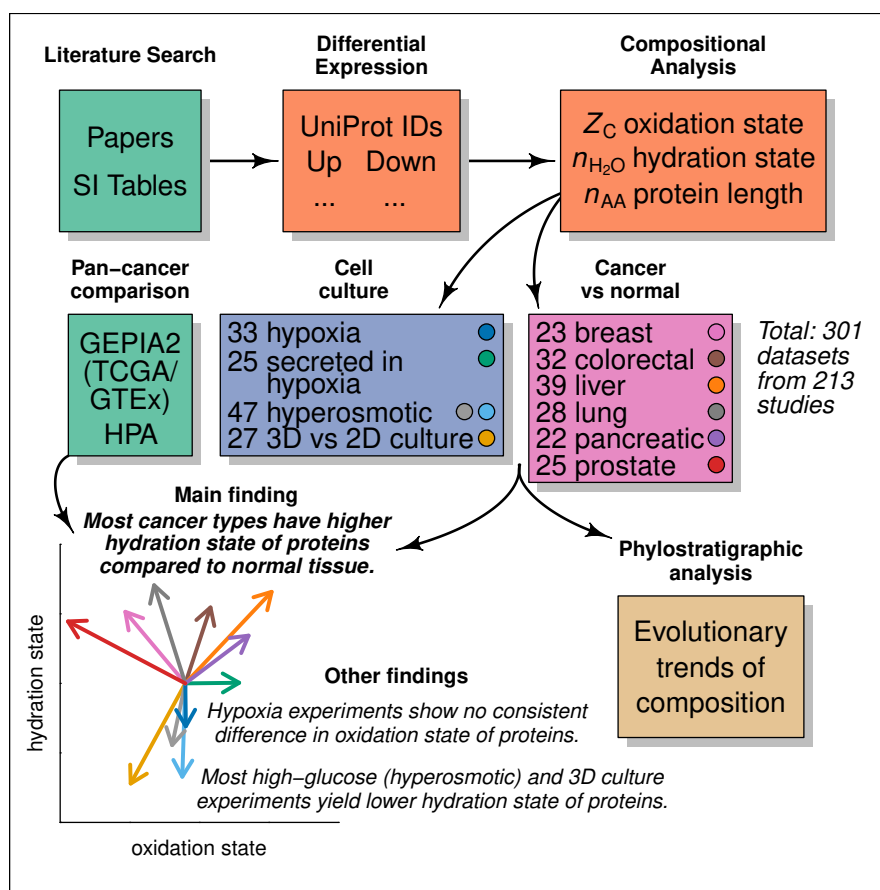

**Figure 1.** Study overview. Abbreviations: SI – Supplementary Information; GEPIA2 – Gene Expression Profiling Interactive Analysis web server; TCGA – The Cancer Genome Atlas; GTEEx – Genotype-Tissue Expression project; HPA – Human Protein Atlas. The number of datasets listed for hyperosmotic conditions includes both high-salt (22) and high-glucose (25) experiments. The arrow diagram represents the mean values of differences of hydration state ( $\Delta n_{H_2O}$ ) and oxidation state ( $\Delta Z_C$ ) for all datasets in each condition (see Table 2).

88 from 213 studies for cell extracts in hypoxia [22–43], secreted proteins in hypoxia [31,33,39,44–59],  
 89 hyperosmotic stress represented by high salt [60–70] or high glucose [71–85], 3D vs 2D cell culture [86–  
 90 104], and breast [105–121], colorectal [122–147], liver [148–176], lung [177–196], pancreatic [197–217],  
 91 and prostate [218–234] cancer.

92 The carbon oxidation state ( $Z_C$ ) and stoichiometric hydration state ( $n_{H_2O}$ ) (Table 1) are  
 93 compositional metrics derived from the chemical formulas of amino acids; therefore, they do not  
 94 denote any particular biological mechanisms for amino acid synthesis. All of the calculations in this  
 95 study are based on differences in the chemical composition of proteins as determined by their primary  
 96 sequences, and do not take account of post-transcriptional modifications, like the oxidation of cysteine  
 97 to make disulfide bonds, or the presence of water molecules in the hydration shell of folded proteins.

98 Carbon oxidation state for biomolecules lies between the extremes of -4 for  $CH_4$  and +4 for  $CO_2$   
 99 (see Figure 1 of ref. [235]). Because it is based on the relative electronegativities of elements, it can  
 100 be calculated directly from the elemental composition of proteins [236,237]. On the other hand, a  
 101 metric for hydration state depends on the stoichiometry of water in balanced chemical reactions.  
 102 Since reactions that consume or release only water do not involve the transfer of electrons, a useful  
 103 metric for hydration state should not be correlated with oxidation state for a collection of proteins  
 104 (i.e. all those coded by the genome). Following this reasoning, the basis species glutamine–glutamic  
 105 acid–cysteine– $H_2O$ – $O_2$  were selected to write theoretical formation reactions of amino acids; the

**Table 1.** Average oxidation state of carbon ( $Z_C$ ), number of carbon atoms ( $n_C$ ), and stoichiometric hydration state ( $n_{H_2O}$ ) of amino acid residues computed using the rQEC derivation (see Materials and Methods and ref. [18]).

| AA | $Z_C$ | $n_C$ | $n_{H_2O}$ | AA | $Z_C$ | $n_C$ | $n_{H_2O}$ |
|----|-------|-------|------------|----|-------|-------|------------|
| A  | 0     | 3     | 0.369      | M  | -2/5  | 5     | 0.046      |
| C  | 2/3   | 3     | -0.025     | N  | 1     | 4     | -0.122     |
| D  | 1     | 4     | -0.122     | P  | -2/5  | 5     | -0.354     |
| E  | 2/5   | 5     | -0.107     | Q  | 2/5   | 5     | -0.107     |
| F  | -4/9  | 9     | -2.568     | R  | 1/3   | 6     | 0.072      |
| G  | 1     | 2     | 0.478      | S  | 2/3   | 3     | 0.575      |
| H  | 2/3   | 6     | -1.825     | T  | 0     | 4     | 0.569      |
| I  | -1    | 6     | 0.660      | V  | -4/5  | 5     | 0.522      |
| K  | -2/3  | 6     | 0.763      | W  | -2/11 | 11    | -4.087     |
| L  | -1    | 6     | 0.660      | Y  | -2/9  | 9     | -2.499     |

106 number of water molecules in these reactions (Table S1) was used as input to a residual analysis to  
107 further reduce the covariation with  $Z_C$  (Fig. S1), giving the residual-corrected stoichiometric hydration  
108 state listed in Table 1. This derivation, denoted “rQEC”, is briefly described in the Materials and  
109 Methods; see ref. [18] for more details and conceptual background.

### 110 2.1. Compositional Differences in Cell Culture Conditions and Cancer Compared to Normal Tissue

111 The compositional analysis of differentially expressed proteins is presented in scatterplots of  
112 median  $\Delta n_{H_2O}$  and  $\Delta Z_C$ , that is, the median value for all up-regulated proteins minus the median  
113 value for all down-regulated proteins in each dataset (Fig. 2 A and B). The median differences for  
114 all datasets in each condition were used to compute the 50% credible regions for highest probability  
115 density using code adapted from the “HPDregionplot” function in the R package emdbook [238],  
116 which in turn uses two-dimensional kernel density estimates calculated with “kde2d” in the R package  
117 MASS [239]. Plots with references and descriptions for all datasets are provided in Figs. S6–S16.

118 Several broad trends emerge from the compositional analysis of differentially expressed proteins  
119 in cell culture conditions. Differentially expressed proteins reported for cell extracts under hypoxia do  
120 not show consistent differences in oxidation state (Fig. 2A). However, differentially expressed proteins  
121 in many datasets for secreted proteins in hypoxia are somewhat oxidized ( $\Delta Z_C > 0$ ). Although the  
122 wider credible region for secreted proteins indicates a larger variability (Fig. 2C), the shift toward  
123 higher  $Z_C$  is statistically significant for these datasets (Table 2). Hyperosmotic stress results in the  
124 formation of proteins with predominantly lower hydration state ( $\Delta n_{H_2O} < 0$ ); the effect is stronger for  
125 high-glucose experiments than for high-salt experiments. Lower hydration state also characterizes the  
126 majority of 3D cell culture experiments, which in addition tend to have more reduced proteins ( $\Delta Z_C <$   
127 0). All of the 3D cell culture experiments analyzed here are for human or mouse cells, including some  
128 cancer cell lines, which are represented by filled circles in Fig. 2A. The experiments for cellular and  
129 secreted proteins in hypoxia include human and other mammalian cells. In contrast, the hyperosmotic  
130 stress experiments include mammalian as well as yeast cells; the latter are indicated by the squares in  
131 Fig. 2A. See the legends of Figs. S6–S10 for details about cell types and culture conditions.

132 There is a clear trend of increased hydration state of proteins ( $\Delta n_{H_2O} > 0$ ) for five of the six  
133 cancer types for which multiple proteomic datasets were compiled (Fig. 2B and C). The exception is  
134 pancreatic cancer, where the datasets are distributed more evenly among positive and negative  $\Delta n_{H_2O}$ .  
135 There are distinct trends in oxidation state of proteins for different cancer types: relatively oxidized  
136 proteins are up-regulated in colorectal, liver, and pancreatic cancer, whereas more reduced proteins are  
137 up-regulated in breast, lung, and prostate cancer.

138 The trends described above are also visible in the arrow diagram in Fig. 1. In this diagram,  
139 the lines are drawn from the origin to the mean difference of  $Z_C$  and  $n_{H_2O}$  among all datasets for  
140 each cancer type and cell culture condition. The mean differences and  $p$ -values are listed in Table 2.

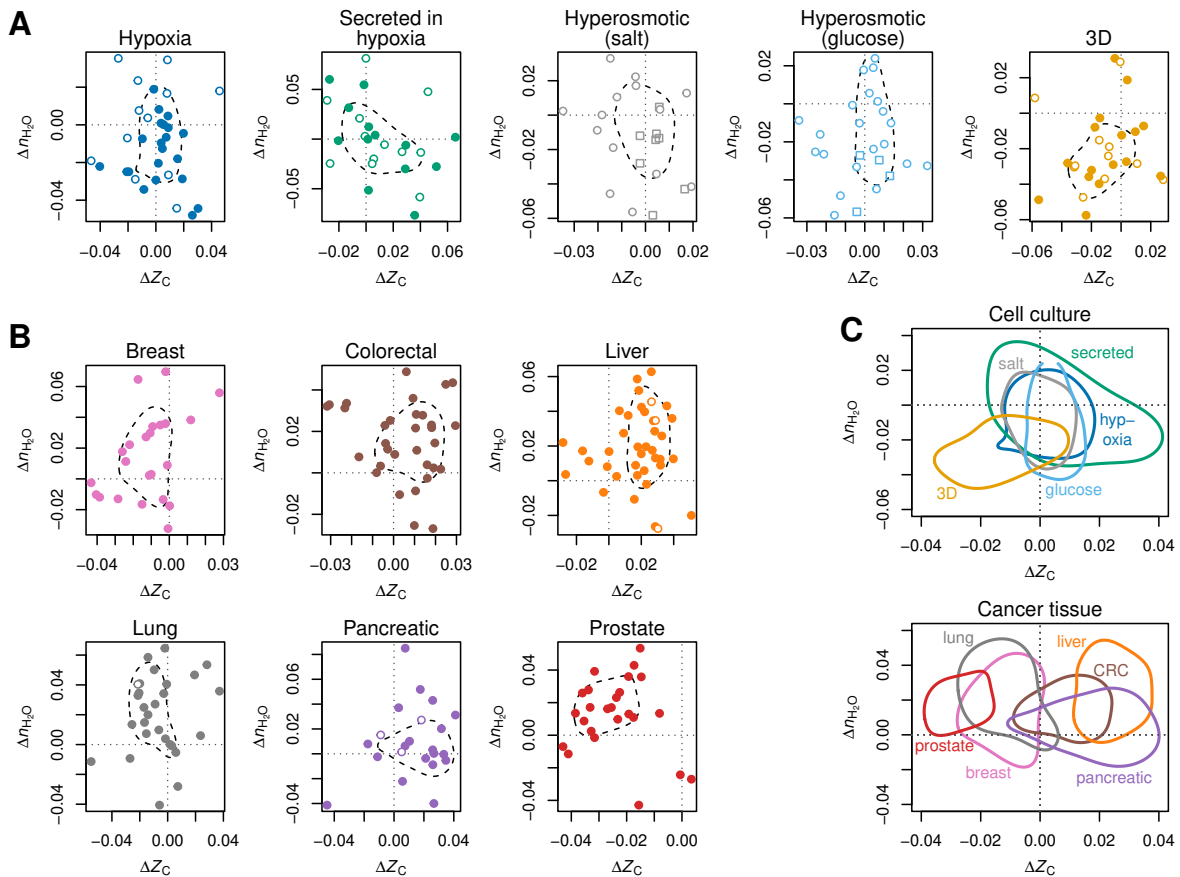

**Figure 2.** Compositional analysis of proteins identified in differential expression datasets. Median differences of stoichiometric hydration state ( $\Delta n_{H_2O}$ ) and average oxidation state of carbon ( $\Delta Z_C$ ) in (A) cell culture experiments and (B) cancer tissues. Each point represents an individual proteomics dataset; positive value of  $\Delta$  indicate a higher median value for the up-regulated proteins. For cell culture experiments, open and filled symbols represent non-cancer and cancer cells, respectively, and squares represent yeast cells. Open symbols for cancer datasets represent mouse or rat models; all others are from human subjects. Dashed lines indicate the 50% credible region for highest probability density for all datasets for each condition. (C) Comparison of the 50% credible regions for cell culture and cancer tissue. Abbreviation: CRC – colorectal cancer.

141 All cancer types have positive mean  $\Delta n_{H_2O}$ , indicating greater hydration state of the up-regulated  
 142 proteins, but the difference for pancreatic cancer is less statistically significant ( $p$ -value > 0.05). In  
 143 contrast, hyperosmotic stress and 3D cell culture conditions, and to a lesser degree, cell extracts in  
 144 hypoxia, show the up-regulation of proteins with significantly lower hydration state.

## 145 2.2. Elevated Hydration State and Variable Oxidation State in Pan-Cancer Datasets

146 Compositional analysis of large-scale pan-cancer datasets is important for assessing the differences  
 147 between cancer types, and for inquiring if changes in compositional metrics for proteins are reflected  
 148 in the differential expression of the genes that code for the proteins. To characterize pan-cancer  
 149 transcriptomes and proteomes in terms of chemical composition, I obtained data for differential gene  
 150 expression between normal tissue and cancer from GEPIA2 [245], which uses pre-compiled data files  
 151 from UCSC Xena [246] that are in turn derived from the Genotype-Tissue Expression project (GTEx)  
 152 [247] and The Cancer Genome Atlas (TCGA) [248]. I used data from the Human Protein Atlas (HPA)  
 153 [244,249] to calculate differential protein expression as described in the Materials and Methods.



**Table 2.** Mean differences for all differential expression datasets in each condition, followed by  $\log_{10}$  of  $p$ -value in parentheses.  $p$ -values less than 0.05 ( $\log_{10} < -1.3$ ) are shown in bold.

| Condition                                                                   | $\Delta Z_C$  | $\Delta n_{H_2O}$ | $\Delta PS^a$ | $\Delta PS^b$ | $\Delta n_{AA}$ |
|-----------------------------------------------------------------------------|---------------|-------------------|---------------|---------------|-----------------|
| <i>Cell culture<sup>c</sup></i>                                             |               |                   |               |               |                 |
| Hypoxia (cell extracts)                                                     | 0.000 (-0.0)  | -0.009 (-1.6)     | 0.45 (-2.5)   | 0.18 (-1.2)   | 7.6 (-0.1)      |
| Secreted in hypoxia                                                         | 0.011 (-1.4)  | 0.000 (-0.0)      | 0.26 (-0.3)   | 0.02 (-0.0)   | -19.6 (-0.3)    |
| Hyperosmotic (salt)                                                         | -0.003 (-0.5) | -0.013 (-1.5)     | -0.17 (-0.7)  | -0.06 (-0.1)  | 16.4 (-0.4)     |
| Hyperosmotic (glucose)                                                      | -0.001 (-0.1) | -0.019 (-3.6)     | -0.09 (-0.2)  | -0.22 (-0.4)  | 11.3 (-0.3)     |
| 3D / 2D                                                                     | -0.011 (-2.0) | -0.021 (-4.2)     | 0.14 (-0.4)   | -0.08 (-0.3)  | -12.6 (-0.2)    |
| <i>Cancer<sup>c</sup></i>                                                   |               |                   |               |               |                 |
| Breast                                                                      | -0.012 (-2.7) | 0.015 (-1.7)      | -1.86 (-6.4)  | -0.84 (-5.9)  | -71.2 (-1.8)    |
| Colorectal                                                                  | 0.005 (-1.1)  | 0.016 (-4.3)      | -0.50 (-2.0)  | -0.31 (-2.7)  | 36.2 (-1.0)     |
| Liver                                                                       | 0.018 (-6.7)  | 0.019 (-5.5)      | 0.37 (-1.4)   | 0.54 (-4.9)   | 20.5 (-0.9)     |
| Lung                                                                        | -0.006 (-1.1) | 0.020 (-3.4)      | -1.04 (-2.8)  | -0.65 (-2.7)  | -44.6 (-0.9)    |
| Pancreatic                                                                  | 0.013 (-2.2)  | 0.010 (-0.9)      | 1.07 (-1.9)   | 0.49 (-1.5)   | 29.5 (-0.5)     |
| Prostate                                                                    | -0.024 (-9.4) | 0.013 (-2.0)      | -1.91 (-8.9)  | -1.05 (-9.5)  | -25.1 (-0.4)    |
| <i>Pan-cancer<sup>c</sup></i>                                               |               |                   |               |               |                 |
| TCGA / GTEX                                                                 | -0.009 (-4.0) | 0.006 (-2.8)      | -0.55 (-2.5)  | -0.25 (-3.0)  | -81.6 (-3.8)    |
| HPA                                                                         | -0.000 (-0.0) | 0.009 (-3.8)      | 0.23 (-0.9)   | -0.08 (-0.6)  | 12.4 (-0.7)     |
| <i>Secreted in hypoxia compared to cell extracts in hypoxia<sup>d</sup></i> |               |                   |               |               |                 |
| up-regulated                                                                | 0.014 (-2.8)  | -0.003 (-0.2)     | 0.71 (-1.5)   | 0.33 (-1.1)   | 42.2 (-0.7)     |
| down-regulated                                                              | 0.003 (-0.3)  | -0.012 (-1.5)     | 0.91 (-3.1)   | 0.49 (-2.0)   | 69.4 (-1.6)     |

**a.** Phylostrata from ref. [240]. **b.** Phylostrata based on gene ages from ref. [241]. **c.** Differences calculated as (mean of median values for up-regulated proteins in each dataset) - (mean of median values for down-regulated proteins in each dataset), except phylostrata, where mean values for up- and down-regulated proteins in each dataset were used. The phylostrata calculations only include datasets for human proteins.  $p$ -values were calculated with the paired Student's  $t$ -test by using R function "t.test" [242]. **d.** Differences calculated as [mean of median values for (up- or down-)regulated proteins secreted in hypoxia] - [mean of median values for (up- or down-)regulated proteins in cell extracts in hypoxia].  $p$ -values were calculated with the unpaired Student's  $t$ -test.

154 Except for prostate cancer, both pan-cancer datasets exhibit a positive  $\Delta n_{H_2O}$  for the cancer types  
 155 for which differential expression data were compiled in this study (color-coded circles in Fig. 3).  
 156 Differential gene expression for all cancer types taken together corresponds to significantly more  
 157 reduced proteins (Table 2, column  $\Delta Z_C$ ), but this is not evident in the HPA proteomics datasets. In  
 158 a pairwise comparison of transcriptomic and proteomic datasets for cancer types, there is very little  
 159 correlation in  $Z_C$  of proteins and even less in  $\Delta n_{H_2O}$  (Fig. S2). It is therefore remarkable that both the  
 160 pan-cancer transcriptomic and proteomic datasets have a strong visible and statistically significant  
 161 trend toward higher hydration state of the associated proteins (Table 2, column  $\Delta n_{H_2O}$ ). This could be  
 162 an indication of an underlying genetic and biochemical tendency in cancer for increased expression of  
 163 proteins with higher hydration state, despite the well-known overall weak correlation between gene  
 164 and protein expression levels in cancer and other cells [250,251].

165 A thermodynamic mass-action hypothesis, i.e. that the nominally reducing effects of hypoxia in  
 166 tumors should in general lead to greater expression of more reduced proteins, is not supported by the  
 167 distribution of positive and negative  $\Delta Z_C$  in the analysis of the HPA datasets. Therefore, a biological  
 168 explanation is needed. It may be helpful to consider differences in the chemical composition of proteins  
 169 in different subcellular locations. Membrane and extracellular proteins in yeast are relatively reduced  
 170 and oxidized, respectively [237]. Similarly, stoichiogenomic analysis of the proteomes of twelve  
 171 eukaryotic organisms indicates that extracellular proteins have a relatively low hydrogen content [252],  
 172 which would tend to increase the average carbon oxidation state. Furthermore, up-regulated proteins  
 173 that are secreted in hypoxia are more oxidized than their counterparts in cell extracts (Table 2). Given

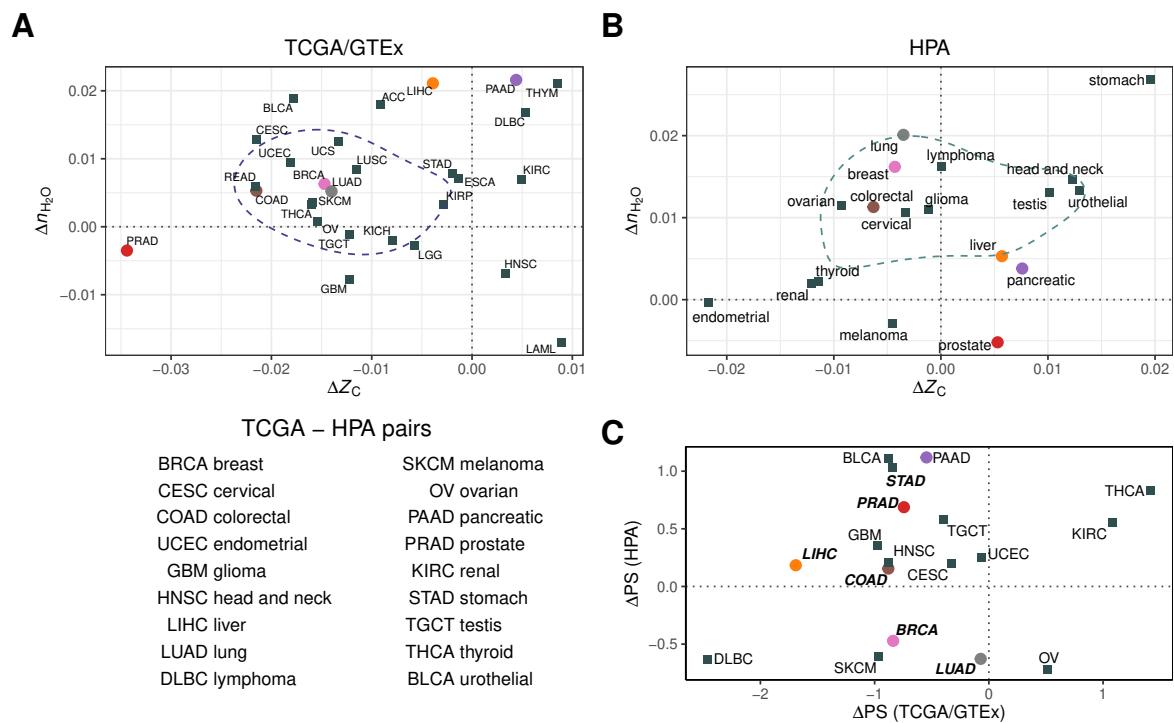

**Figure 3.** Changes in chemical composition and phylostrata for differentially regulated proteins associated with large-scale transcriptomics and protein antibody studies. (A) Proteins coded by differentially expressed genes between normal tissue (GTEx) and cancer (TCGA). Abbreviations for cancer types are listed in Table S2 (from ref. [243]). (B) Differentially expressed proteins in the Human Protein Atlas [244]. Dashed lines in panels A and B indicate the 50% credible region for highest probability density. (C) Mean differences of phylostrata (PS, from ref. [240]) for differentially expressed genes (TCGA/GTEx) and genes coding for differentially expressed proteins (HPA). The figure legend shows the TCGA–HPA pairings used for this plot. Color-coded circles represent cancer types with proteomic data compiled in this study (see Fig. 2) and bold italic labels indicate cancer types in the study of Trigos et al. [240]. See Figs. S17–S18 for  $\Delta PS$  calculated for all TCGA and HPA datasets.

174 these general subcellular differences, it is interesting that tissues found by Uhlén et al. [244] to be  
 175 enriched in membrane proteins (brain and kidney) host cancers with negative values of  $\Delta Z_C$  (glioma  
 176 and renal, respectively), while tissues with high levels of proteins known to be secreted (pancreas) or  
 177 enriched in the transcripts of secreted proteins (liver, stomach) host cancers characterized by positive  
 178 values of  $\Delta Z_C$ . These patterns seem to imply that the normal enrichment of subcellular protein classes  
 179 in different tissue types could be magnified in cancer.

180 It is also informative to compare the compositional metrics with experimental measurements of  
 181 the hydration status in different types of cancer. For instance, NMR  $T_1$  relaxation times are correlated  
 182 with the early stages of progression of pancreatic ductal adenocarcinoma in mice, but not later stages;  
 183 this is likely a consequence of increased water and protein content in the early stages [253]. This  
 184 stage-specific variation of water content may help explain why the range of  $\Delta n_{H_2O}$  of proteins in  
 185 pancreatic cancer is closer to zero, compared to other cancer types (Figs. 2C, 3B). In another study,  
 186 optical measurements of gliomas in rats in the spectral range 350–1800 nm were used to infer increased  
 187 water content in early stages, but decreased amounts in advanced stages, in conjunction with the  
 188 formation of necrotic regions in the tumor [254]. This appears to be consistent with the small decrease  
 189 in  $\Delta n_{H_2O}$  between LGG (brain lower grade glioma) and GMB (glioblastoma multiforme) in the TCGA  
 190 dataset (Fig. 3A), but it is not possible to observe this trend in the HPA dataset, which only represents  
 191 a single glioma category with positive  $\Delta n_{H_2O}$  (Fig. 3B).

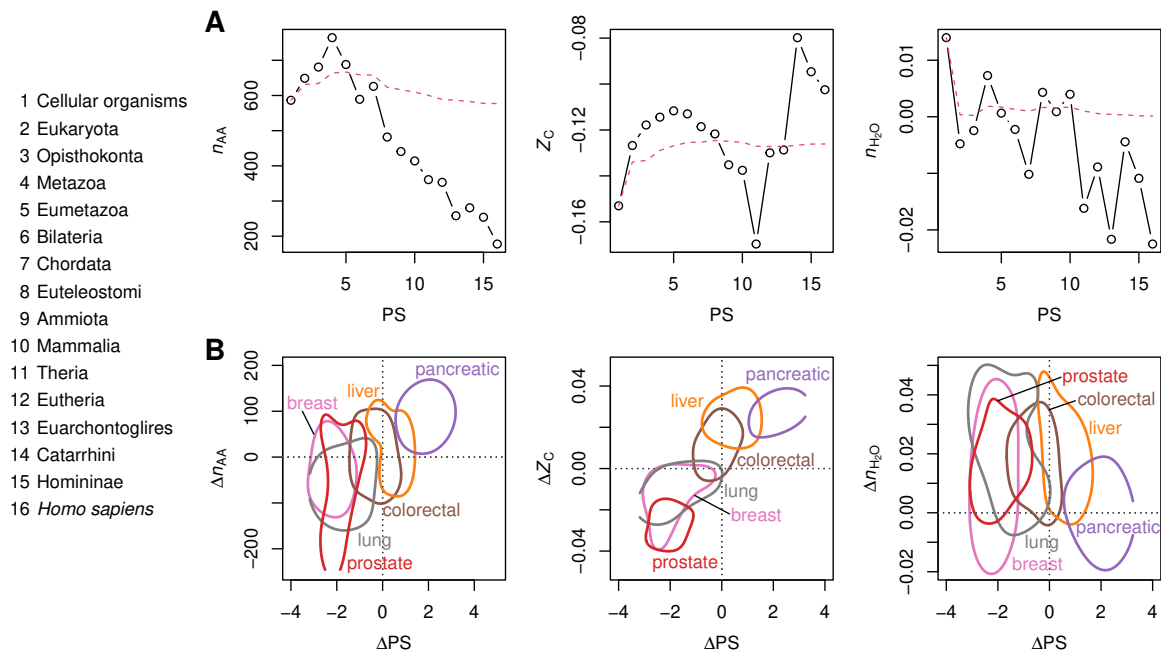

**Figure 4.** Compositional analysis of proteins using phylostrata given by Trigou et al. [240]. **(A)** Mean values of  $n_{AA}$ ,  $Z_C$ , and  $n_{H_2O}$  of proteins for all protein-coding genes in each phylostratum (PS). The points stand for the mean values for individual phylostrata, and the red line indicates the cumulative mean starting from PS 1. **(B)** 50% credible regions for mean differences of PS plotted against median differences of  $n_{AA}$ ,  $Z_C$ , and  $n_{H_2O}$  for the six cancer types for which differential expression datasets were compiled in this study. Positive values of  $\Delta PS$  indicate up-regulation of proteins coded by younger genes.

192 Compared to other cancer types, prostate cancer has distinct trends in the chemical composition  
193 of differentially expressed proteins. The negative  $\Delta n_{H_2O}$  of proteins for prostate cancer in the TCGA  
194 and HPA datasets (Fig. 3) could be associated with the lower water content of prostate cancer  
195 than surrounding normal tissue, as reported in one study using near infrared spectroscopy [255].  
196 However, for unknown reasons this trend is not apparent in the compiled proteomic datasets (Fig. 2B).  
197 Furthermore, the highly negative  $\Delta Z_C$  of the proteins in the compiled proteomic datasets (Fig. 2B) and  
198 those coded by differentially expressed genes in prostate cancer (Fig. 3A) might somehow be related to  
199 the hypoxic characteristics of normal prostate tissue [256] and the unusual metabolic profile of prostate  
200 cancer, including *de novo* lipid synthesis [257] and associated impacts on cellular redox balance [258].

### 201 2.3. Relations between Phylostrata, Chemical Composition, and Protein Length

202 Several studies have linked gene expression in cancer to phylogenetically earlier genes [240,259].  
203 The phylostratigraphic analysis used in these studies assigns ages of genes based on the latest common  
204 ancestor whose descendants have all the computationally detected homologs of that gene. To analyze  
205 the evolutionary trends of oxidation and hydration state of proteins, I used 16 phylostrata (PS)  
206 for human protein-coding genes given by Trigou et al. [240]. Using average values for proteins  
207 coded by genes in each phylostratum, Fig. 4A shows an initial rise in protein length, leading up to  
208 Eukaryota, which is consistent with earlier reports that median protein length is greater in eukaryotes  
209 than prokaryotes [260]. The decrease of protein length in later phylostrata is likely an artifact of  
210 BLAST-based homology searches [261].

211 Fig. 4A also shows distinct evolutionary patterns of oxidation state and hydration state of proteins.  
212  $Z_C$  forms a strikingly smooth hump between PS 1 and 11 then increases rapidly to the maximum at PS  
213 14, followed by a smaller decline to *Homo sapiens*.  $n_{H_2O}$  shows an overall decrease through time,  
214 but exhibits considerable local variation.



215 Trigos et al. [240] used RNAseq gene expression levels from TCGA for cancer and normal  
216 tissue as weights to calculate the transcriptome age index (TAI). The TAI was lower for the seven  
217 considered cancer types (LUAD, LUSC, BRCA, PRAD, LIHC, COAD, STAD; see Table S2 for definitions  
218 of abbreviations) compared to normal tissue, indicating generally higher expression of older genes.  
219 I used a different calculation, where  $\Delta PS$  represents non-weighted differences between the means  
220 for up- and down-expressed genes, and obtained negative values for the same cancer types using  
221 the TCGA/GTEX data (see Fig. 3C for selected cancer types that are paired between TCGA and HPA  
222 and Fig. S16 for all TCGA cancer types for which differential gene expression data are available from  
223 GEPIA2, including LUSC). Therefore, in agreement with Trigos et al. [240], most cancer transcriptomes  
224 are characterized by higher expression of older genes ( $\Delta PS < 0$ ). However, analysis of the HPA datasets  
225 shows that many proteomes exhibit younger ages of the corresponding genes ( $\Delta PS > 0$ ) (Fig. 3C).  
226 Taken together, the negative differences for transcriptomes are more statistically significant (Table 1).  
227 The positive  $\Delta PS$  for kidney renal clear cell carcinoma (KIRC) in both datasets (Fig. 3C), which was  
228 not analyzed by Trigos et al. [240], is consistent with the large enrichment of vertebrate genes in this  
229 cancer type [259]. The agreement with previous work suggests that  $\Delta PS$  is a reasonable metric for  
230 comparing gene ages in different cancer types.

231 The positive association between  $\Delta PS$  and protein length ( $\Delta n_{AA}$ ) for differentially expressed  
232 proteins in cancer (Fig. 4B) implies that the corresponding genes are mostly present in Trigos PS 1  
233 (cellular organisms) to 4 (metazoa), which are characterized by a smoothly increasing protein length  
234 (Fig. 4A). This agrees with previous studies wherein the differentially expressed genes in cancer were  
235 shown to consist for the most part of genes originating from the unicellular–multicellular transition  
236 [240,259]. It follows that ages inferred for cancer-related genes are not greatly affected by the artifacts  
237 that are likely present in later phylostrata assignments. To gather more evidence, I also used phylostrata  
238 corresponding to eight gene ages reported by Liebeskind et al. [241] based on consensus tables for  
239 different age-estimation algorithms. Note that the Liebeskind ages have three steps between cellular  
240 organisms and Eukaryota, providing a greater resolution in earlier evolution, and stop at Mammalia,  
241 which corresponds to Trigos PS 10. Keeping in mind the different resolutions and scales of the Trigos  
242 and Liebeskind gene ages, the two datasets show similar maxima for  $Z_C$  and protein length near  
243 Eumetazoa (or Opisthokonta, which is not one of the Trigos phylostrata), and an overall decrease of  
244  $n_{H_2O}$  during evolution (Figs. 4A and S3).

245 A positive association between  $\Delta PS$  and  $\Delta Z_C$  for differentially expressed proteins in cancer would  
246 be expected based on the continually increasing  $Z_C$  for phylostrata 1–4 shown in Fig. 4A. Although the  
247 TCGA datasets exhibit a weak negative correlation between  $\Delta PS$  and  $\Delta Z_C$ , the correlation is positive  
248 and somewhat stronger for the HPA datasets (Fig. S4). Similarly, a positive association between  
249  $\Delta PS$  and  $\Delta Z_C$  is visible for the compiled proteomic datasets in Fig. 4B. It follows that differences  
250 in evolutionary ages of cancer-associated genes may help explain some of the wide variability of  
251 oxidation state of differentially expressed proteins found for different cancer types. However, the  
252 hydration state of the same proteins is largely independent of ages of the corresponding genes (Fig.  
253 4B), and the magnitude of  $\Delta n_{H_2O}$  is larger in cancer (from 0.01 to 0.02; Table 2) than the cumulative  
254 difference between PS 1 and 4 (ca. 0.01; Fig. 4A), so something else is needed to account for the  
255 increased hydration state of proteins in cancer.

### 256 3. Discussion

257 The evolutionary trends inferred from phylostrata may help to rationalize some features of  
258 differential expression of proteins in cancer. For instance, despite the hypoxic nature of tumors,  
259 previous authors did not find significantly lower oxygen contents of proteins in glioma and stomach  
260 cancer compared to normal tissue [262,263]. Likewise, in this study a range of differences in carbon  
261 oxidation state was documented, from very negative values for prostate cancer to positive values for  
262 colorectal, pancreatic, and liver cancer. Across these cancer types, there is a close association between  
263  $\Delta Z_C$  and  $\Delta PS$  (Fig. 4B). Unlike the proteomic data, pan-cancer transcriptomes show higher expression

264 of generally older genes that also code for more reduced proteins (Fig. 3 A and C), so the genetic  
265 connection between the chemical compositions of proteins and tumor hypoxia appears to be shaped  
266 more by evolutionary trends than by physicochemical constraints.

267 It would be fruitful to compare the current results for biomolecular oxidation state with oxygen  
268 and redox measurements for tumors [13,14], but systematic measurements across tumor types may not  
269 be available. The results can also be compared with hypoxia scores computed from gene expression  
270 data [264], with the caveat that they are not physicochemical measurements. Median hypoxia scores  
271 reported for 19 tumor types [265] are not correlated with differences of  $Z_C$  or  $n_{H_2O}$  from TCGA or HPA  
272 data (Fig. S5, but note the weak positive correlation between hypoxia score and  $\Delta n_{H_2O}$  for the HPA  
273 datasets). In general, therefore, gene expression-based hypoxia scores and chemical compositions of  
274 proteins likely reflect distinct physiological processes. Nevertheless, the significantly negative  $\Delta Z_C$  on  
275 average for the TCGA data (Fig. 3A; Table 2) raises the possibility that the chemical composition of  
276 differentially expressed proteins at the transcriptional level, but for some reason not translational level,  
277 reflects the hypoxic conditions that occur in many tumor microenvironments.

278 It is also somewhat surprising that hypoxia in cell culture generally does not induce the  
279 up-regulation of more reduced proteins (Table 2). The frequent downregulation of mitochondrial  
280 proteins in hypoxia [36,39] provides a possible explanation. Not only are mitochondria strongly anoxic  
281 subcellular compartments [266], but their proteins also have a relatively low  $Z_C$  compared to other  
282 subcellular fractions including the cytoplasm and nucleus [237,267], so their downregulation would  
283 tend to produce more oxidized proteins at the whole-cell level. More proteomic data for subcellular  
284 fractions are needed to better understand the overall cellular response and perhaps also what causes  
285 proteins secreted in hypoxia to be relatively oxidized (Table 2).

286 In marked contrast to the diverse trends of oxidation state, most cancer types are characterized by  
287 a higher stoichiometric hydration state of proteins at both the transcriptional and translational levels.  
288 These results indicate that water is consumed as a reactant when the differential expression of proteins  
289 in cancer is represented theoretically as an overall chemical reaction. This observation represents a  
290 bridge between proteomic data and experimental observations of elevated water content in tumors  
291 [6,268,269], and provides a novel line of evidence supporting the hypothesis of a primary role for  
292 elevated cellular hydration in cancer [8].

293 Further developments of genome-scale metabolic and macromolecular expression models [272]  
294 should be pursued to generate more precise estimates of the net water and oxygen demands for amino  
295 acid biosynthesis, uptake and incorporation into proteomes in different conditions. Nevertheless,  
296 the power of a compositional analysis of chemical formulas should not be overlooked. The quantile  
297 distributions plotted in Fig. 5 A and B provide a striking example, showing minor differences in  $Z_C$ ,  
298 but large positive differences of  $n_{H_2O}$  for proteins coded by up-regulated genes compared to those  
299 coded by down-regulated genes in a “common aneuploidy gene expression” dataset (CAGE) [270].  
300 The increases of  $n_{H_2O}$  occur over a large majority of quantile points; in other words, the differences  
301 in this case exhibit nearly stochastic ordering, and therefore could arise from globally significant  
302 compositional biases [273]. Although the previous plots only show the median differences for many  
303 other datasets, it is possible to compute the quantile distributions for each dataset using the data  
304 deposited along with this paper (Section 4.5).

305 Aneuploidy, or changes in chromosome number, is common in cancer cells [1], and Tsai et al.  
306 [270] found that gene expression patterns in aneuploid yeast cells are similar to those in normal  
307 yeast cells exposed to hypoosmotic (that is, more dilute, the opposite of hyperosmotic) conditions.  
308 Compositional analysis of data for gene expression in stressed yeast cells [271] indeed shows that the  
309 proteins coded by the differentially expressed genes in hypoosmotic conditions have higher  $n_{H_2O}$ , and  
310 those in hyperosmotic conditions have lower  $n_{H_2O}$  (Fig. 5 C and D and Fig. S19). The large increases  
311 in  $n_{H_2O}$  of the proteins coded by differentially expressed genes in both aneuploidy and hypoosmotic  
312 conditions suggests an possible underlying physicochemical factor: the chemical compositions of the  
313 proteins may reflect higher water activity in relatively dilute conditions. Unfortunately, gene or protein

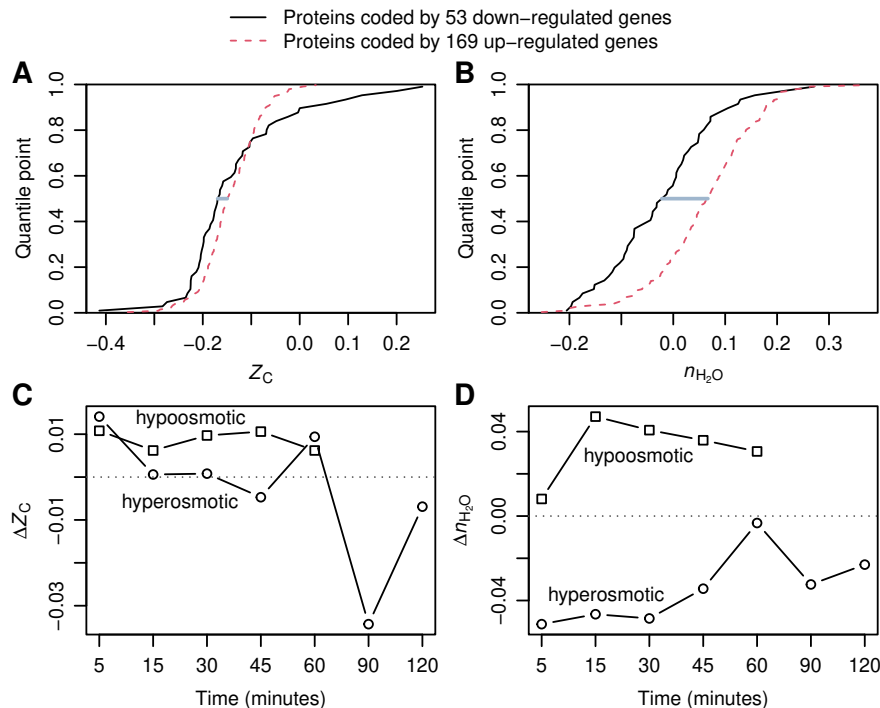

**Figure 5.** Quantile distributions of (A)  $Z_C$  and (B)  $n_{H_2O}$  for proteins coded by differentially expressed genes in aneuploid yeast cells compared to haploid cells [270]. The median differences are indicated by the horizontal lines drawn at the 0.5 quantile point. Median differences of (C)  $\Delta Z_C$  and (D)  $\Delta n_{H_2O}$  between groups of proteins coded by up- and down-regulated genes in yeast cells exposed to hyperosmotic shock (sudden shift from 0 to 1 M sorbitol) or hypoosmotic shock (growth at 1 M sorbitol followed by centrifugation to collect cells and resuspension in medium with 0 M sorbitol) [271].

314 expression data for hypo- and hyperosmotic experiments have not been reported for cancer cells, so it  
 315 is currently unknown whether they show a similar response.

316 The claim that differences of stoichiometric hydration state of proteins can be used as an indicator  
 317 of physicochemical conditions of cells is strengthened by compositional analysis of proteomic data for  
 318 cell culture in controlled laboratory experiments. In response to changing salinities, the interiors of  
 319 most cells must be at least isosmotic with the environment to maintain a physiological water content  
 320 [274]. Nevertheless, hyperosmotic conditions still exert a dehydrating effect on cell interiors, as shown  
 321 by experiments with *Escherichia coli* in which the water content of cells grown in hyperosmotic NaCl  
 322 solutions is substantially lowered [275]. Likewise, I found that the hydration state of differentially  
 323 expressed proteins often decreases in NaCl-induced hyperosmotic stress in non-cancer eukaryotic cells  
 324 (Fig. 2C and Table 2). A similar trend is visible in proteomics data for bacterial cells, but the effect  
 325 is not very large [18]. On the other hand, experiments with eukaryotic cells in high-glucose media,  
 326 which are often used to model the effects of hyperglycemia in diabetes and are also recognized for  
 327 generating hyperosmotic conditions [85], show a larger average decrease in hydration state of proteins  
 328 (Table 2). The present results support the hypothesis that osmotically induced dehydration provides a  
 329 thermodynamic drive for the preferential expression of proteins with lower stoichiometric hydration  
 330 state.

331 An initially unexpected finding is that the hydration state of proteins is substantially lower in  
 332 3D culture, including spheroids and aggregates, compared to traditional 2D culture in monolayers  
 333 (Fig. 2A; see also Fig. S9). This finding might be linked with the less liquid-like state of the cytoplasm  
 334 in 3D culture [276]. These results are also concordant with metagenomes of particle-sized fractions  
 335 compared to free-living microbes in river and marine samples; the former, which are more likely to  
 336 harbor multicellular communities, are associated with lower  $n_{H_2O}$  of the coded proteins [18]. Besides

337 the strong decrease of  $n_{\text{H}_2\text{O}}$ , up-regulated proteins in 3D culture also tend to be more reduced (Table  
338 2), which might reflect the attainment of hypoxic conditions in the interiors of spheroids [20,21,277].

339 Mesenchymal stromal cells growing in aggregates proliferate more slowly than those in  
340 monolayers under otherwise similar conditions [104]. For tumor spheroids themselves, the  
341 proliferation of cells in the core is inhibited in stress clamp experiments, which drives water out  
342 of the aggregates [278]. In monolayer cell culture, hyperosmotic conditions slow the proliferation  
343 of breast cancer cells [279] and can induce prostate cancer cells cultured at low density to enter a  
344 dormant state [280]. In contrast to lower water content, which is a feature of dormant cells [9], cell  
345 swelling in hypoosmotic conditions is a proliferative signal [281], and increased total  $\text{K}^+$  and water  
346 content accompanies the onset of proliferation in human blood lymphocytes exiting a quiescent state  
347 [282]. Complementary to these experimental observations, uncontrolled proliferation is identified  
348 as one of the hallmarks of cancer cells [283]. Against this background, the findings in this study of  
349 higher  $n_{\text{H}_2\text{O}}$  for proteins in both cancer and hypoosmotic conditions, together with lower  $n_{\text{H}_2\text{O}}$  in both  
350 hyperosmotic and 3D culture conditions, could represent a new biochemical link in the association  
351 between cellular hydration levels and proliferation.

## 352 4. Materials and Methods

### 353 4.1. Proteomics Datasets

354 Differential protein expression data reported for any proteomics method applied to cell culture  
355 experiments and cancer compared to normal tissue were located through literature searches. Several  
356 review articles were also consulted in order to locate experimental data for breast cancer [284], lung  
357 cancer [285,286], and 3D cell culture [277]. In general, datasets were selected that have a minimum of  
358 30 up-regulated and 30 down-regulated proteins in order to reduce random variation associated with  
359 small sample sizes, but smaller datasets (at least ca. 20 up-regulated and 20 down-regulated proteins)  
360 were included for hyperosmotic stress, secreted proteins in hypoxia, lung cancer, and prostate cancer  
361 due to limited availability of data.

362 Previous compilations for hypoxia and colorectal and pancreatic cancer [19] were updated in this  
363 study using more recently located datasets. Datasets related to prognosis, conditioned media, stromal  
364 samples, and adenoma were removed from the updated compilation for colorectal cancer. In addition,  
365 datasets for cellular and secreted proteins in hypoxia were considered separately, and datasets for  
366 reoxygenation after hypoxia were excluded. The previous compilation of data for hyperosmotic stress  
367 [19] was also expanded in this study, but a fish gill proteome and two transcriptomic datasets were  
368 excluded, and high-salt and high-glucose datasets were analyzed separately.

369 Lists of significantly differentially expressed proteins were taken directly from the original  
370 publications if possible. In cases of datasets where mass spectrometric data but not lists of differentially  
371 expressed proteins were reported, quantile normalization using function “normalize.quantiles” in  
372 the R package preprocessCore [287] was performed on the intensities or peak areas in order to obtain  
373 normalized values that were used to calculate expression ratios. Where needed, reported protein  
374 or gene identifiers were converted to UniProt IDs using the UniProt mapping tool [288]. Protein  
375 sequences downloaded from UniProt were used to generate amino acid compositions using function  
376 “read.fasta” in the R package CHNOSZ [289]. The canonical protein sequences in UniProt were used,  
377 unless isoforms were identified in the data sources. Details of additional processing steps are given  
378 with Figs. S6–S16.

### 379 4.2. Differential Expression from Pan-Cancer Datasets

380 Immunohistochemistry-based expression profiles of proteins in normal tissue and pathology  
381 samples were downloaded from the Human Protein Atlas version 19 [244,249]. Pathology and normal  
382 tissue datasets were paired based on information from the HPA web site [290]: breast cancer / breast;  
383 cervical cancer / cervix, uterine; colorectal cancer / colon; endometrial cancer / endometrium 1;

384 glioma / cerebral cortex; head and neck cancer / salivary gland; liver cancer / liver; lung cancer /  
385 lung; lymphoma / lymph node; melanoma / skin 1; skin cancer / skin 1; ovarian cancer / ovary;  
386 pancreatic cancer / pancreas; prostate cancer / prostate; renal cancer / kidney; stomach cancer /  
387 stomach 1; testis cancer / testis; thyroid cancer / thyroid gland; urothelial cancer / urinary bladder.  
388 Antibody staining intensities were converted to a semi-quantitative scale (not detected: 0, low: 1,  
389 medium: 3, high: 5). The expression level score for each protein was calculated by averaging the score  
390 for available samples, including “not detected” but excluding unavailable (NA) observations, and, for  
391 normal tissues, observations in all available cell types. Differences in expression score between normal  
392 and cancer  $\geq 2.5$  or  $\leq -2.5$  were considered to be differentially expressed proteins.

393 Differential gene expression values were obtained using version 2 of the Gene Expression Profiling  
394 Interactive Analysis web server (GEPIA2) [245] with default settings (ANOVA,  $\log_2$  fold change cutoff  
395 = 1,  $q$ -value cutoff = 0.01). Pairings between source datasets for cancer (TCGA) and normal tissue  
396 (GTEx), as described on the GEPIA2 website [291] are: ACC / adrenal gland; BLCA / bladder; BRCA /  
397 breast; CESC / cervix uteri; COAD / colon; DLBC / blood; ESCA / esophagus; GBM / brain; KICH /  
398 kidney; KIRC / kidney; KIRP / kidney; LAML / bone marrow; LGG / brain; LIHC / liver; LUAD /  
399 lung; LUSC / lung; OV / ovary; PAAD / pancreas; PRAD / prostate; READ / colon; SKCM / skin;  
400 STAD / stomach; TGCT / testis; THCA / thyroid; THYM / blood; UCEC / uterus; UCS / uterus. Gene  
401 expression data for both tumor and normal tissue for HNSC are from TCGA. Differential expression  
402 data were not available on GEPIA2 for five other cancer types in TCGA (CHOL, MESO, PCPG, SARC,  
403 UVM). Ensembl Gene IDs used in HPA and GEPIA were converted to UniProt accession numbers  
404 using the UniProt mapping tool [288].

#### 405 4.3. Compositional Metrics

406 Values of average oxidation state of carbon ( $Z_C$ ) of amino acids (Table 1) were calculated from the  
407 chemical formulas of the amino acids [236,237]. Values for  $Z_C$  of proteins were computed by combining  
408 the amino acid compositions of proteins with  $Z_C$  of amino acids and also weighting by carbon number  
409 [18]. That is,  $Z_C = \sum Z_{C,i}n_i n_{C,i} / \sum n_i n_{C,i}$ , where the summation is over  $i = 1..20$  amino acids and  $Z_{C,i}$ ,  
410  $n_i$ , and  $n_{C,i}$  are the carbon oxidation state, frequency in the protein sequence, and number of carbon  
411 atoms of the  $i$ th amino acid, respectively.

412 Values of stoichiometric hydration state ( $n_{H_2O}$ ) for amino acids (Table 1) were calculated using  
413 the rQEC derivation described by Dick et al. [18]. Briefly, the numbers of  $H_2O$  in theoretical formation  
414 reactions for the 20 amino acid residues were obtained by projecting the elemental compositions of  
415 the amino acids into the basis species glutamine, glutamic acid, cysteine,  $H_2O$ , and  $O_2$  (QEC basis  
416 species; see Table S1 and Fig. S1A). The stoichiometric hydration state was obtained by calculating  
417 the residuals of a linear model fit to  $n_{H_2O}$  and  $Z_C$  for the amino acid residues, then subtracting a  
418 constant from the residuals to make the mean per-residue value for all human proteins equal to zero.  
419 The residual analysis ensures that there is no correlation between  $n_{H_2O}$  and  $Z_C$  of amino acids (Fig.  
420 S1B). To compute per-residue values for proteins, the values of  $n_{H_2O}$  for amino acid residues from  
421 Table 1 were combined with the amino acid compositions of the proteins. That is,  $n_{H_2O} = \sum n_{H_2O,i}n_i /$   
422  $\sum n_i$ , where  $n_{H_2O,i}$  and  $n_i$  are the stoichiometric hydration state and frequency of the  $i$ th amino acid  
423 residue, respectively. Accordingly,  $\Delta n_{H_2O} = 0.01$  corresponds to a difference of approximately 3 water  
424 molecules in the theoretical formation reaction of a typical 300-residue protein.

#### 425 4.4. Phylostrata

426 Phylostrata were obtained from the supporting information of Trigos et al. [240] and the  
427 “main\_HUMAN.csv” file of Liebeskind et al. [241,292]. Liebeskind et al. did not give phylostrata  
428 numbers, so phylostrata 1–8 were assigned here based on the names in the “modeAge” column of  
429 the source file (see Fig. S3). The Ensembl gene identifiers in the Trigos dataset were converted to  
430 UniProt accession numbers [288]; in the case of duplicate UniProt accession numbers, the first matching  
431 phylostratum was used.



#### 4.5. Data deposition

The compiled differential expression data are provided in the canprot R package, version 1.0.0 (<https://cran.r-project.org/package=canprot>). Other data used for this paper are in the “canH2O”, “aneuploidy”, and “yeast\_stress” directories of the JMDplots package, version 1.2.2 (<https://github.com/jedick/JMDplots>). The specified versions of both of these packages are also deposited on Zenodo [293,294]. Figs. S6–S16 are derived from the vignettes in the canprot package, and the code for the remaining figures and Tables 2 and S1 is in the JMDplots package; the “canH2O” vignette in this package has the function calls used to make the figures and tables.

**Supplementary Materials:** Figures S1–S19, Tables S1–S2.

**Funding:** This research received no external funding.

**Acknowledgments:** I am grateful to Alex Greenhough, Youngsoo Kim, Ming-Chih Lai, and Gordana Vunjak-Novakovic for providing data files. The results shown here are in part based upon data generated by the TCGA Research Network (<https://www.cancer.gov/tcga>) and the Human Protein Atlas (<https://www.proteinatlas.org>).

**Conflicts of Interest:** The author declares no conflict of interest.

#### References

1. Vogelstein, B.; Papadopoulos, N.; Velculescu, V.E.; Zhou, S.; Diaz, L.A.; Kinzler, K.W. Cancer genome landscapes. *Science* **2013**, *339*, 1546–1558. doi:10.1126/science.1235122.
2. Gillies, R.J.; Robey, I.; Gatenby, R.A. Causes and consequences of increased glucose metabolism of cancers. *Journal of Nuclear Medicine* **2008**, *49*, 24S–42S. doi:10.2967/jnumed.107.047258.
3. Höckel, M.; Vaupel, P. Tumor hypoxia: Definitions and current clinical, biologic, and molecular aspects. *Journal of the National Cancer Institute* **2001**, *93*, 266–276. doi:10.1093/jnci/93.4.266.
4. Winzler, R.J. The chemistry of cancer tissue. In *The Physiopathology of Cancer*, 2nd ed.; Homburger, F., Ed.; Hoeber-Harper: New York, 1959; pp. 686–706.
5. Downing, J.E.; Christopherson, W.M.; Broghamer, W.L. Nuclear water content during carcinogenesis. *Cancer* **1962**, *15*, 1176–1180. doi:10.1002/1097-0142(196211/12)15:6<1176::AID-CNCR2820150614>3.0.CO;2-F.
6. Surmacki, J.; Musial, J.; Kordek, R.; Abramczyk, H. Raman imaging at biological interfaces: Applications in breast cancer diagnosis. *Molecular Cancer* **2013**, *12*, 48. doi:10.1186/1476-4598-12-48.
7. Barroso, E.M.; Smits, R.W.H.; Bakker Schut, T.C.; ten Hove, I.; Hardillo, J.A.; Wolvius, E.B.; Baatenburg de Jong, R.J.; Koljenović, S.; Puppels, G.J. Discrimination between oral cancer and healthy tissue based on water content determined by Raman spectroscopy. *Analytical Chemistry* **2015**, *87*, 2419–2426. doi:10.1021/ac504362y.
8. McIntyre, G.I. Cell hydration as the primary factor in carcinogenesis: A unifying concept. *Medical Hypotheses* **2006**, *66*, 518–526. doi:10.1016/j.mehy.2005.09.022.
9. Munder, M.C.; Midtvedt, D.; Franzmann, T.; Nüske, E.; Otto, O.; Herbig, M.; Ulbricht, E.; Müller, P.; Taubenberger, A.; Maharana, S.; Malinowska, L.; Richter, D.; Guck, J.; Ziburdaev, V.; Alberti, S. A pH-driven transition of the cytoplasm from a fluid- to a solid-like state promotes entry into dormancy. *eLife* **2016**, *5*, e09347. doi:10.7554/eLife.09347.
10. Morowitz, H.J. A theory of biochemical organization, metabolic pathways, and evolution. *Complexity* **1999**, *4*, 39–53. doi:10.1002/(SICI)1099-0526(199907/08)4:6<39::AID-CPLX8>3.0.CO;2-2.
11. Braakman, R.; Smith, E. The compositional and evolutionary logic of metabolism. *Physical Biology* **2013**, *10*, 011001. doi:10.1088/1478-3975/10/1/011001.
12. Philipp, F.V.; Scott, D.A.; Ronai, Z.A.; Osterman, A.L.; Smith, J.W. Reverse TCA cycle flux through isocitrate dehydrogenases 1 and 2 is required for lipogenesis in hypoxic melanoma cells. *Pigment Cell & Melanoma Research* **2012**, *25*, 375–383. doi:10.1111/j.1755-148X.2012.00989.x.
13. Kuppasamy, P.; Afeworki, M.; Shankar, R.A.; Coffin, D.; Krishna, M.C.; Hahn, S.M.; Mitchell, J.B.; Zweier, J.L. *In vivo* electron paramagnetic resonance imaging of tumor heterogeneity and oxygenation in a murine model. *Cancer Research* **1998**, *58*, 1562–1568. <https://cancerres.aacrjournals.org/content/58/7/1562>.

- 481 14. Hyodo, F.; Davis, R.M.; Hyodo, E.; Matsumoto, S.; Krishna, M.C.; Mitchell, J.B. The relationship between  
482 tissue oxygenation and redox status using magnetic resonance imaging. *International Journal of Oncology*  
483 **2012**, *41*, 2103–2108. doi:10.3892/ijo.2012.1638.
- 484 15. Guzy, R.D.; Schumacker, P.T. Oxygen sensing by mitochondria at complex III: The paradox of  
485 increased reactive oxygen species during hypoxia. *Experimental Physiology* **2006**, *91*, 807–819.  
486 doi:10.1113/expphysiol.2006.033506.
- 487 16. Häussinger, D.; Lang, F.; Gerok, W. Regulation of cell function by the cellular hydration state. *American*  
488 *Journal of Physiology* **1994**, *267*, E343–E355. doi:10.1152/ajpendo.1994.267.3.E343.
- 489 17. Nelson, D.M.; Cox, M.M. *Lehninger Principles of Biochemistry*, 4th ed.; W. H. Freeman and Company: New  
490 York, 2005.
- 491 18. Dick, J.M.; Yu, M.; Tan, J. Uncovering chemical signatures of salinity gradients through compositional  
492 analysis of protein sequences. *Biogeosciences Discussions* **2020**, *in review*. doi:10.5194/bg-2020-146.
- 493 19. Dick, J.M. Chemical composition and the potential for proteomic transformation in cancer, hypoxia, and  
494 hyperosmotic stress. *PeerJ* **2017**, *5*, e3421. doi:10.7717/peerj.3421.
- 495 20. Hirschhaeuser, F.; Menne, H.; Dittfeld, C.; West, J.; Mueller-Klieser, W.; Kunz-Schughart, L.A. Multicellular  
496 tumor spheroids: An underestimated tool is catching up again. *Journal of Biotechnology* **2010**, *148*, 3–15.  
497 doi:10.1016/j.jbiotec.2010.01.012.
- 498 21. Baker, B.M.; Chen, C.S. Deconstructing the third dimension – how 3D culture microenvironments alter  
499 cellular cues. *Journal of Cell Science* **2012**, *125*, 3015–3024. doi:10.1242/jcs.079509.
- 500 22. Stockwin, L.H.; Blonder, J.; Bumke, M.A.; Lucas, D.A.; Chan, K.C.; Conrads, T.P.; Issaq, H.J.; Veenstra, T.D.;  
501 Newton, D.L.; Rybak, S.M. Proteomic analysis of plasma membrane from hypoxia-adapted malignant  
502 melanoma. *Journal of Proteome Research* **2006**, *5*, 2996–3007. doi:10.1021/pr0601739.
- 503 23. Fuhrmann, D.C.; Wittig, I.; Heide, H.; Dehne, N.; Brüne, B. Chronic hypoxia alters mitochondrial  
504 composition in human macrophages. *Biochimica et Biophysica Acta (BBA) - Proteins and Proteomics* **2013**,  
505 *1834*, 2750–2760. doi:10.1016/j.bbapap.2013.09.023.
- 506 24. Ren, Y.; Hao, P.; Dutta, B.; Cheow, E.S.H.; Sim, K.H.; Gan, C.S.; Lim, S.K.; Sze, S.K. Hypoxia modulates  
507 A431 cellular pathways association to tumor radioresistance and enhanced migration revealed by  
508 comprehensive proteomic and functional studies. *Molecular & Cellular Proteomics* **2013**, *12*, 485–498.  
509 doi:10.1074/mcp.M112.018325.
- 510 25. Villeneuve, L.; Tiede, L.M.; Morse, B.; Fox, H.S. Quantitative proteomics reveals oxygen-dependent  
511 changes in neuronal mitochondria affecting function and sensitivity to rotenone. *Journal of Proteome*  
512 *Research* **2013**, *12*, 4599–4606. doi:10.1021/pr400758d.
- 513 26. Djidja, M.C.; Chang, J.; Hadjiprocopis, A.; Schmich, F.; Sinclair, J.; Mršnik, M.; Schoof, E.M.; Barker, H.E.;  
514 Linding, R.; Jørgensen, C.; Erler, J.T. Identification of hypoxia-regulated proteins using MALDI-mass  
515 spectrometry imaging combined with quantitative proteomics. *Journal of Proteome Research* **2014**,  
516 *13*, 2297–2313. doi:10.1021/pr401056c.
- 517 27. Dutta, B.; Yan, R.; Lim, S.K.; Tam, J.P.; Sze, S.K. Quantitative profiling of chromatome dynamics reveals a  
518 novel role for HP1BP3 in hypoxia-induced oncogenesis. *Molecular & Cellular Proteomics* **2014**, *13*, 3236–3249.  
519 doi:10.1074/mcp.M114.038232.
- 520 28. Bousquet, P.A.; Sandvik, J.A.; Arntzen, M.Ø.; Jeppesen Edin, N.F.; Christoffersen, S.; Kregel, U.;  
521 Pettersen, E.O.; Thiede, B. Hypoxia strongly affects mitochondrial ribosomal proteins and translocases,  
522 as shown by quantitative proteomics of HeLa cells. *International Journal of Proteomics* **2015**, *2015*, 678527.  
523 doi:10.1155/2015/678527.
- 524 29. Ho, J.J.D.; Wang, M.; Audas, T.; Kwon, D.; Carlsson, S.; Timpano, S.; Evagelou, S.; Brothers, S.; Gonzalgo,  
525 M.; Krieger, J.; Chen, S.; Uniacke, J.; Lee, S. Systemic reprogramming of translation efficiencies on oxygen  
526 stimulus. *Cell Reports* **2016**, *14*, 1293–1300. doi:10.1016/j.celrep.2016.01.036.
- 527 30. Lai, M.C.; Chang, C.M.; Sun, H.S. Hypoxia induces autophagy through translational  
528 up-regulation of lysosomal proteins in human colon cancer cells. *PLOS One* **2016**, *11*, e0153627.  
529 doi:10.1371/journal.pone.0153627.
- 530 31. Cosme, J.; Guo, H.; Hadipour-Lakmehsari, S.; Emili, A.; Gramolini, A.O. Hypoxia-induced changes in the  
531 fibroblast secretome, exosome, and whole-cell proteome using cultured, cardiac-derived cells isolated from  
532 neonatal mice. *Journal of Proteome Research* **2017**, *16*, 2836–2847. doi:10.1021/acs.jproteome.7b00144.

- 533 32. Zhang, K.; Xu, P.; Sowers, J.L.; Machuca, D.F.; Mirfattah, B.; Herring, J.; Tang, H.; Chen, Y.; Tian, B.;  
534 Brasier, A.R.; Sowers, L.C. Proteome analysis of hypoxic glioblastoma cells reveals sequential metabolic  
535 adaptation of one-carbon metabolic pathways. *Molecular & Cellular Proteomics* **2017**, *16*, 1906–1921.  
536 doi:10.1074/mcp.RA117.000154.
- 537 33. Chen, J.T.; Liu, C.C.; Yu, J.S.; Li, H.H.; Lai, M.C. Integrated omics profiling identifies hypoxia-regulated  
538 genes in HCT116 colon cancer cells. *Journal of Proteomics* **2018**, *188*, 139–151. doi:10.1016/j.jprot.2018.02.031.
- 539 34. Greenhough, A.; Bagley, C.; Heesom, K.J.; Gurevich, D.B.; Gay, D.; Bond, M.; Collard, T.J.; Paraskeva,  
540 C.; Martin, P.; Sansom, O.J.; Malik, K.; Williams, A.C. Cancer cell adaptation to hypoxia involves a  
541 HIF-GPRC5A-YAP axis. *EMBO Molecular Medicine* **2018**, *10*, e8699. doi:10.15252/emmm.201708699.
- 542 35. Lee, J.; Kim, H.S.; Kim, S.M.; Kim, D.I.; Lee, C.W. Hypoxia upregulates mitotic cyclins which contribute  
543 to the multipotency of human mesenchymal stem cells by expanding proliferation lifespan. *Molecules and  
544 Cells* **2018**, *41*, 207–213. doi:10.14348/molcells.2018.2231.
- 545 36. Wobma, H.M.; Tamargo, M.A.; Goeta, S.; Brown, L.M.; Duran-Struuck, R.; Vunjak-Novakovic, G. The  
546 influence of hypoxia and IFN- $\gamma$  on the proteome and metabolome of therapeutic mesenchymal stem cells.  
547 *Biomaterials* **2018**, *167*, 226–234. doi:10.1016/j.biomaterials.2018.03.027.
- 548 37. Chachami, G.; Stankovic-Valentin, N.; Karagiota, A.; Basagianni, A.; Plessmann, U.; Urlaub, H.; Melchior,  
549 F.; Simos, G. Hypoxia-induced changes in SUMO conjugation affect transcriptional regulation under low  
550 oxygen. *Molecular & Cellular Proteomics* **2019**, *18*, 1197–1209. doi:10.1074/mcp.RA119.001401.
- 551 38. Gupta, N.; Park, J.E.; Tse, W.; Low, J.K.; Kon, O.L.; McCarthy, N.; Sze, S.K. ERO1 $\alpha$  promotes hypoxic tumor  
552 progression and is associated with poor prognosis in pancreatic cancer. *Oncotarget* **2019**, *10*, 5970–5982.  
553 doi:10.18632/oncotarget.27235.
- 554 39. Kugeratski, F.G.; Atkinson, S.J.; Neilson, L.J.; Lilla, S.; Knight, J.R.P.; Serneels, J.; Juin, A.; Ismail,  
555 S.; Bryant, D.M.; Markert, E.K.; Machesky, L.M.; Mazzone, M.; Sansom, O.J.; Zanivan, S. Hypoxic  
556 cancer-associated fibroblasts increase NCBP2-AS2/HIAR to promote endothelial sprouting through  
557 enhanced VEGF signaling. *Science Signaling* **2019**, *12*, eaan8247. doi:10.1126/scisignal.aan8247.
- 558 40. Li, Q.; Luo, T.; Lu, W.; Yi, X.; Zhao, Z.; Liu, J. Proteomic analysis of human periodontal ligament cells  
559 under hypoxia. *Proteome Science* **2019**, *17*, 3. doi:10.1186/s12953-019-0151-2.
- 560 41. Bush, J.T.; Chan, M.C.; Mohammed, S.; Schofield, C. Quantitative MS-based proteomics comparing the  
561 MCF-7 cellular response to hypoxia and a 2-oxoglutarate analogue. *ChemBioChem* **2020**, *21*, 1647–1655.  
562 doi:10.1002/cbic.201900719.
- 563 42. Ross, J.A.; Vissers, J.P.; Nanda, J.; Stewart, G.D.; Husi, H.; Habib, F.K.; Hammond, D.E.; Gethings, L.A.  
564 The influence of hypoxia on the prostate cancer proteome. *Clinical Chemistry and Laboratory Medicine* **2020**,  
565 *58*, 980–993. doi:10.1515/cclm-2019-0626.
- 566 43. Song, Z.; Pearce, M.C.; Jiang, Y.; Yang, L.; Goodall, C.; Miranda, C.L.; Milovancev, M.; Bracha, S.; Kolluri,  
567 S.K.; Maier, C.S. Delineation of hypoxia-induced proteome shifts in osteosarcoma cells with different  
568 metastatic propensities. *Scientific Reports* **2020**, *10*, 727. doi:10.1038/s41598-019-56878-x.
- 569 44. Blankley, R.T.; Robinson, N.J.; Aplin, J.D.; Crocker, I.P.; Gaskell, S.J.; Whetton, A.D.; Baker, P.N.; Myers,  
570 J.E. A gel-free quantitative proteomics analysis of factors released from hypoxic-conditioned placentae.  
571 *Reproductive Sciences* **2010**, *17*, 247–257. doi:10.1177/1933719109351320.
- 572 45. Park, J.E.; Tan, H.S.; Datta, A.; Lai, R.C.; Zhang, H.; Meng, W.; Lim, S.K.; Sze, S.K. Hypoxic tumor cell  
573 modulates its microenvironment to enhance angiogenic and metastatic potential by secretion of proteins  
574 and exosomes. *Molecular & Cellular Proteomics* **2010**, *9*, 1085–1099. doi:10.1074/mcp.M900381-MCP200.
- 575 46. de Jong, O.G.; Verhaar, M.C.; Chen, Y.; Vader, P.; Gremmels, H.; Posthuma, G.; Schiffelers, R.M.; Gucek, M.;  
576 van Balkom, B.W. Cellular stress conditions are reflected in the protein and RNA content of endothelial  
577 cell-derived exosomes. *Journal of Extracellular Vesicles* **2012**, *1*, 18396. doi:10.3402/jev.v1i0.18396.
- 578 47. Salomon, C.; Kobayashi, M.; Ashman, K.; Sobrevia, L.; Mitchell, M.D.; Rice, G.E. Hypoxia-induced  
579 changes in the bioactivity of cytotrophoblast-derived exosomes. *PLOS One* **2013**, *8*, e79636.  
580 doi:10.1371/journal.pone.0079636.
- 581 48. Salomon, C.; Ryan, J.; Sobrevia, L.; Kobayashi, M.; Ashman, K.; Mitchell, M.; Rice, G.E. Exosomal signaling  
582 during hypoxia mediates microvascular endothelial cell migration and vasculogenesis. *PLOS One* **2013**,  
583 *8*, e68451. doi:10.1371/journal.pone.0068451.

- 584 49. Li, X.; Ren, Y.; Sorokin, V.; Poh, K.K.; Ho, H.H.; Lee, C.N.; de Kleijn, D.; Lim, S.K.; Tam, J.P.; Sze, S.K.  
585 Quantitative profiling of the rat heart myoblast secretome reveals differential responses to hypoxia and  
586 re-oxygenation stress. *Journal of Proteomics* **2014**, *98*, 138–149. doi:10.1016/j.jprot.2013.12.025.
- 587 50. Yoon, J.H.; Kim, J.; Kim, K.L.; Kim, D.H.; Jung, S.J.; Lee, H.; Ghim, J.; Kim, D.; Park, J.B.; Ryu, S.H.; Lee,  
588 T.G. Proteomic analysis of hypoxia-induced U373MG glioma secretome reveals novel hypoxia-dependent  
589 migration factors. *Proteomics* **2014**, *14*, 1494–1502. doi:10.1002/pmic.201300554.
- 590 51. Cox, T.R.; Rumney, R.M.H.; Schoof, E.M.; Perryman, L.; Høye, A.M.; Agrawal, A.; Bird, D.; Latif, N.A.;  
591 Forrest, H.; Evans, H.R.; Huggins, I.D.; Lang, G.; Linding, R.; Gartland, A.; Erler, J.T. The hypoxic  
592 cancer secretome induces pre-metastatic bone lesions through lysyl oxidase. *Nature* **2015**, *522*, 106–110.  
593 doi:10.1038/nature14492.
- 594 52. Ramteke, A.; Ting, H.; Agarwal, C.; Mateen, S.; Somasagara, R.; Hussain, A.; Graner, M.; Frederick,  
595 B.; Agarwal, R.; Deep, G. Exosomes secreted under hypoxia enhance invasiveness and stemness of  
596 prostate cancer cells by targeting adherens junction molecules. *Molecular Carcinogenesis* **2015**, *54*, 554–565.  
597 doi:10.1002/mc.22124.
- 598 53. Riis, S.; Stensballe, A.; Emmersen, J.; Pennisi, C.P.; Birkelund, S.; Zachar, V.; Fink, T. Mass spectrometry  
599 analysis of adipose-derived stem cells reveals a significant effect of hypoxia on pathways regulating  
600 extracellular matrix. *Stem Cell Research & Therapy* **2016**, *7*, 1–14. doi:10.1186/s13287-016-0310-7.
- 601 54. Dorayappan, K.D.P.; Wanner, R.; Wallbillich, J.J.; Saini, U.; Zingarelli, R.; Suarez, A.A.; Cohn, D.E.;  
602 Selvendiran, K. Hypoxia-induced exosomes contribute to a more aggressive and chemoresistant ovarian  
603 cancer phenotype: a novel mechanism linking STAT3/Rab proteins. *Oncogene* **2018**, *37*, 3806–3821.  
604 doi:10.1038/s41388-018-0189-0.
- 605 55. Felice, F.; Piras, A.M.; Rocchiccioli, S.; Barsotti, M.C.; Santoni, T.; Pucci, A.; Burchielli, S.; Chiellini, F.;  
606 Ucciferri, N.; Solaro, R.; Altomare, A.; Cecchetti, A.; Stefano, R.D. Endothelial progenitor cell secretome  
607 delivered by novel polymeric nanoparticles in ischemic hindlimb. *International Journal of Pharmaceutics*  
608 **2018**, *542*, 82–89. doi:10.1016/j.ijpharm.2018.03.015.
- 609 56. Ontoria-Oviedo, I.; Dorronsoro, A.; Sánchez, R.; Ciria, M.; Gómez-Ferrer, M.; Buigues, M.; Grueso,  
610 E.; Tejedor, S.; García-García, F.; González-King, H.; Garcia, N.A.; Peiró-Molina, E.; Sepúlveda, P.  
611 Extracellular vesicles secreted by hypoxic AC10 cardiomyocytes modulate fibroblast cell motility. *Frontiers*  
612 *in Cardiovascular Medicine* **2018**, *5*, 152. doi:10.3389/fcvm.2018.00152.
- 613 57. Chandran, V.I.; Welinder, C.; Gonçalves de Oliveira, K.; Cerezo-Magaña, M.; Månsson, A.S.; Johansson,  
614 M.C.; Marko-Varga, G.; Belting, M. Global extracellular vesicle proteomic signature defines U87-MG glioma  
615 cell hypoxic status with potential implications for non-invasive diagnostics. *Journal of Neuro-Oncology* **2019**,  
616 *144*, 477–488. doi:10.1007/s11060-019-03262-4.
- 617 58. Najgebauer, H.; Jarnuczak, A.F.; Varro, A.; Sanderson, C.M. Integrative omic profiling reveals  
618 unique hypoxia induced signatures in gastric cancer associated myofibroblasts. *Cancers* **2019**, *11*, 263.  
619 doi:10.3390/cancers11020263.
- 620 59. Park, J.E.; Dutta, B.; Tse, S.W.; Gupta, N.; Tan, C.F.; Low, J.K.; Yeoh, K.W.; Kon, O.L.; Tam, J.P.; Sze, S.K.  
621 Hypoxia-induced tumor exosomes promote M2-like macrophage polarization of infiltrating myeloid cells  
622 and microRNA-mediated metabolic shift. *Oncogene* **2019**, *38*, 5158–5173. doi:10.1038/s41388-019-0782-x.
- 623 60. Dihazi, H.; Asif, A.R.; Agarwal, N.K.; Doncheva, Y.; Müller, G.A. Proteomic analysis of cellular response to  
624 osmotic stress in thick ascending limb of Henle’s loop (TALH) cells. *Molecular & Cellular Proteomics* **2005**,  
625 *4*, 1445–1458. doi:10.1074/mcp.M400184-MCP200.
- 626 61. Mao, L.; Hartl, D.; Nolden, T.; Koppelstätter, A.; Klose, J.; Himmelbauer, H.; Zabel, C. Pronounced  
627 alterations of cellular metabolism and structure due to hyper- or hypo-osmosis. *Journal of Proteome Research*  
628 **2008**, *7*, 3968–3983. doi:10.1021/pr800245x.
- 629 62. Lee, M.V.; Topper, S.E.; Hubler, S.L.; Hose, J.; Wenger, C.D.; Coon, J.J.; Gasch, A.P. A dynamic model of  
630 proteome changes reveals new roles for transcript alteration in yeast. *Molecular Systems Biology* **2011**, *7*, 514.  
631 doi:10.1038/msb.2011.48.
- 632 63. Oswald, E.S.; Brown, L.M.; Bulinski, J.C.; Hung, C.T. Label-free protein profiling of adipose-derived  
633 human stem cells under hyperosmotic treatment. *Journal of Proteome Research* **2011**, *10*, 3050–3059.  
634 doi:10.1021/pr200030v.



- 635 64. Li, J.; Ferraris, J.D.; Yu, D.; Singh, T.; Izumi, Y.; Wang, G.; Gucek, M.; Burg, M.B. Proteomic analysis of  
636 high NaCl-induced changes in abundance of nuclear proteins. *Physiological Genomics* **2012**, *44*, 1063–1071.  
637 doi:10.1152/physiolgenomics.00068.2012.
- 638 65. Chen, L.; Li, J.; Guo, T.; Ghosh, S.; Koh, S.K.; Tian, D.; Zhang, L.; Jia, D.; Beuerman, R.W.; Aebersold, R.;  
639 Chan, E.C.Y.; Zhou, L. Global metabolomic and proteomic analysis of human conjunctival epithelial  
640 cells (IOBA-NHC) in response to hyperosmotic stress. *Journal of Proteome Research* **2015**, *14*, 3982–3995.  
641 doi:10.1021/acs.jproteome.5b00443.
- 642 66. Selevsek, N.; Chang, C.Y.; Gillet, L.C.; Navarro, P.; Bernhardt, O.M.; Reiter, L.; Cheng, L.Y.;  
643 Vitek, O.; Aebersold, R. Reproducible and consistent quantification of the *Saccharomyces cerevisiae*  
644 proteome by SWATH-mass spectrometry. *Molecular & Cellular Proteomics* **2015**, *14*, 739–749.  
645 doi:10.1074/mcp.M113.035550.
- 646 67. Yang, L.B.; Dai, X.M.; Zheng, Z.Y.; Zhu, L.; Zhan, X.B.; Lin, C.C. Proteomic analysis of erythritol-producing  
647 *Yarrowia lipolytica* from glycerol in response to osmotic pressure. *Journal of Microbiology and Biotechnology*  
648 **2015**, *25*, 1056–1069. doi:10.4014/jmb.1412.12026.
- 649 68. Gamboni, F.; Anderson, C.; Mitra, S.; Reisz, J.A.; Nemkov, T.; Dzieciatkowska, M.; Jones, K.L.; Hansen,  
650 K.C.; D'Alessandro, A.; Banerjee, A. Hypertonic saline primes activation of the p53–p21 signaling axis in  
651 human small airway epithelial cells that prevents inflammation induced by pro-inflammatory cytokines.  
652 *Journal of Proteome Research* **2016**, *15*, 3813–3826. doi:10.1021/acs.jproteome.6b00602.
- 653 69. da Silva Rodrigues, L.N.; de Almeida Brito, W.; Parente, A.F.A.; Weber, S.S.; Bailão, A.M.; Casaletti, L.;  
654 Borges, C.L.; de Almeida Soares, C.M. Osmotic stress adaptation of *Paracoccidioides lutzii*, Pb01, monitored  
655 by proteomics. *Fungal Genetics and Biology* **2016**, *95*, 13–23. doi:10.1016/j.fgb.2016.08.001.
- 656 70. Jacobsen, M.D.; Beynon, R.J.; Gethings, L.A.; Claydon, A.J.; Langridge, J.I.; Vissers, J.P.C.; Brown, A.J.P.;  
657 Hammond, D.E. Specificity of the osmotic stress response in *Candida albicans* highlighted by quantitative  
658 proteomics. *Scientific Reports* **2018**, *8*, 14492. doi:10.1038/s41598-018-32792-6.
- 659 71. Pham, T.K.; Wright, P.C. The proteomic response of *Saccharomyces cerevisiae* in very high glucose conditions  
660 with amino acid supplementation. *Journal of Proteome Research* **2008**, *7*, 4766–4774. doi:10.1021/pr800331s.
- 661 72. Waanders, L.F.; Chwalek, K.; Monetti, M.; Kumar, C.; Lammert, E.; Mann, M. Quantitative proteomic  
662 analysis of single pancreatic islets. *Proceedings of the National Academy of Sciences* **2009**, *106*, 18902–18907.  
663 doi:10.1073/pnas.0908351106.
- 664 73. Wang, X.L.; Fu, A.; Spiro, C.; Lee, H.C. Proteomic analysis of vascular endothelial cells: effects  
665 of laminar shear stress and high glucose. *Journal of Proteomics & Bioinformatics* **2009**, *2*, 445–445.  
666 doi:10.4172/jpb.1000104.
- 667 74. Maris, M.; Ferreira, G.B.; D'Hertog, W.; Cnop, M.; Waelkens, E.; Overbergh, L.; Mathieu, C. High glucose  
668 induces dysfunction in insulin secretory cells by different pathways: a proteomic approach. *Journal of*  
669 *Proteome Research* **2010**, *9*, 6274–6287. doi:10.1021/pr100557w.
- 670 75. Chen, Y.H.; Chen, J.Y.; Chen, Y.W.; Lin, S.T.; Chan, H.L. High glucose-induced proteome alterations in  
671 retinal pigmented epithelium cells and its possible relevance to diabetic retinopathy. *Molecular Biosystems*  
672 **2012**, *8*, 3107–3124. doi:10.1039/C2MB25331C.
- 673 76. Schrimpe-Rutledge, A.C.; Fontès, G.; Gritsenko, M.A.; Norbeck, A.D.; Anderson, D.J.; Waters, K.M.; Adkins,  
674 J.N.; Smith, R.D.; Poitout, V.; Metz, T.O. Discovery of novel glucose-regulated proteins in isolated human  
675 pancreatic islets using LC–MS/MS-based proteomics. *Journal of Proteome Research* **2012**, *11*, 3520–3532.  
676 doi:10.1021/pr3002996.
- 677 77. Chen, J.Y.; Chou, H.C.; Chen, Y.H.; Chan, H.L. High glucose-induced proteome alterations in hepatocytes  
678 and its possible relevance to diabetic liver disease. *Journal of Nutritional Biochemistry* **2013**, *24*, 1889–1910.  
679 doi:10.1016/j.jnutbio.2013.05.006.
- 680 78. Chen, X.; Cui, Z.; Wei, S.; Hou, J.; Xie, Z.; Peng, X.; Li, J.; Cai, T.; Hang, H.; Yang, F. Chronic high glucose  
681 induced INS-1 $\beta$  cell mitochondrial dysfunction: A comparative mitochondrial proteome with SILAC.  
682 *Proteomics* **2013**, *13*, 3030–3039. doi:10.1002/pmic.201200448.
- 683 79. Liu, Z.; Dai, S.; Bones, J.; Ray, S.; Cha, S.; Karger, B.L.; Li, J.J.; Wilson, L.; Hinckle, G.; Rossomando, A. A  
684 quantitative proteomic analysis of cellular responses to high glucose media in Chinese hamster ovary cells.  
685 *Biotechnology Progress* **2015**, *31*, 1026–1038. doi:10.1002/btpr.2090.



- 686 80. Burger, D.; Turner, M.; Xiao, F.; Munkonda, M.N.; Akbari, S.; Burns, K.D. High glucose increases the  
687 formation and pro-oxidative activity of endothelial microparticles. *Diabetologia* **2017**, *60*, 1791–1800.  
688 doi:10.1007/s00125-017-4331-2.
- 689 81. Schmuldach, A.; Felton, J.; Kennedy, R.T.; Dovichi, N.J. Bottom-up proteomics analysis of the  
690 secretome of murine islets of Langerhans in elevated glucose levels. *Analyst* **2017**, *142*, 284–291.  
691 doi:10.1039/C6AN02268E.
- 692 82. Huang, S.; Gaucher, F.; Cauty, C.; Jardin, J.; Le Loir, Y.; Jeantet, R.; Chen, X.D.; Jan, G. Growth in  
693 hyper-concentrated sweet whey triggers multi stress tolerance and spray drying survival in *Lactobacillus*  
694 *casei* BL23: from the molecular basis to new perspectives for sustainable probiotic production. *Frontiers in*  
695 *Microbiology* **2018**, *9*, 2548. doi:10.3389/fmicb.2018.02548.
- 696 83. Irshad, Z.; Xue, M.; Ashour, A.; Larkin, J.R.; Thornalley, P.J.; Rabbani, N. Activation of the unfolded protein  
697 response in high glucose treated endothelial cells is mediated by methylglyoxal. *Scientific Reports* **2019**,  
698 *9*, 7889. doi:10.1038/s41598-019-44358-1.
- 699 84. Meneses-Romero, E.; Hernández-Orihuela, L.; Pando-Robles, V.; López, T.D.; Oses-Prieto, J.A.; Burlingame,  
700 A.L.; Batista, C.V. Quantitative proteomic analysis reveals high interference on protein expression of  
701 H9c2 cells activated with glucose and cardiotoxic steroids. *Journal of Proteomics* **2020**, *211*, 103536.  
702 doi:10.1016/j.jprot.2019.103536.
- 703 85. Madonna, R.; Pieragostino, D.; Rossi, C.; Confalone, P.; Cicalini, I.; Minnucci, I.; Zucchelli, M.; Del Boccio,  
704 P.; De Caterina, R. Simulated hyperglycemia impairs insulin signaling in endothelial cells through a  
705 hyperosmolar mechanism. *Vascular Pharmacology* **2020**, *130*, 106678. doi:10.1016/j.vph.2020.106678.
- 706 86. Pruksakorn, D.; Lirdprapamongkol, K.; Chokchaichamnankit, D.; Subhasitanont, P.; Chiablaem, K.; Svasti,  
707 J.; Srisomsap, C. Metabolic alteration of HepG2 in scaffold-based 3-D culture: Proteomic approach.  
708 *Proteomics* **2010**, *10*, 3896–3904. doi:10.1002/pmic.201000137.
- 709 87. Morrison, B.J.; Hastie, M.L.; Grewal, Y.S.; Bruce, Z.C.; Schmidt, C.; Reynolds, B.A.; Gorman, J.J.; Lopez,  
710 J.A. Proteomic comparison of MCF-7 tumoursphere and monolayer cultures. *PLOS One* **2012**, *7*, e52692.  
711 doi:10.1371/journal.pone.0052692.
- 712 88. McMahon, K.M.; Volpato, M.; Chi, H.Y.; Musiwaro, P.; Poterlowicz, K.; Peng, Y.; Scally, A.J.; Patterson,  
713 L.H.; Phillips, R.M.; Sutton, C.W. Characterization of changes in the proteome in different regions of 3D  
714 multicell tumor spheroids. *Journal of Proteome Research* **2012**, *11*, 2863–2875. doi:10.1021/pr2012472.
- 715 89. Yan, M.; Yang, X.; Wang, L.; Clark, D.; Zuo, H.; Ye, D.; Chen, W.; Zhang, P. Plasma membrane proteomics  
716 of tumor spheres identify CD166 as a novel marker for cancer stem-like cells in head and neck squamous  
717 cell carcinoma. *Molecular & Cellular Proteomics* **2013**, *12*, 3271–3284. doi:10.1074/mcp.M112.025460.
- 718 90. Zanivan, S.; Maione, F.; Hein, M.Y.; Hernández-Fernaund, J.R.; Ostasiewicz, P.; Giraud, E.; Mann, M.  
719 SILAC-based proteomics of human primary endothelial cell morphogenesis unveils tumor angiogenic  
720 markers. *Molecular & Cellular Proteomics* **2013**, *12*, 3599–3611. doi:10.1074/mcp.M113.031344.
- 721 91. He, W.; Kuang, Y.; Xing, X.; Simpson, R.J.; Huang, H.; Yang, T.; Chen, J.; Yang, L.; Liu, E.; He, W.; Gu, J.  
722 Proteomic comparison of 3D and 2D glioma models reveals increased HLA-E expression in 3D models is  
723 associated with resistance to NK cell-mediated cytotoxicity. *Journal of Proteome Research* **2014**, *13*, 2272–2281.  
724 doi:10.1021/pr500064m.
- 725 92. Konze, S.A.; van Diepen, L.; Schröder, A.; Olmer, R.; Möller, H.; Pich, A.; Weißmann, R.; Kuss, A.W.;  
726 Zweigerdt, R.; Buettner, F.F.R. Cleavage of E-cadherin and  $\beta$ -catenin by calpain affects Wnt signaling and  
727 spheroid formation in suspension cultures of human pluripotent stem cells. *Molecular & Cellular Proteomics*  
728 **2014**, *13*, 990–1007. doi:10.1074/mcp.M113.033423.
- 729 93. Rajcevic, U.; Knol, J.; Piersma, S.; Bougnaud, S.; Fack, F.; Sundlisaeter, E.; Sondena, K.; Myklebust,  
730 R.; Pham, T.; Niclou, S.; Jimenez, C. Colorectal cancer derived organotypic spheroids maintain  
731 essential tissue characteristics but adapt their metabolism in culture. *Proteome Science* **2014**, *12*, 39.  
732 doi:10.1186/1477-5956-12-39.
- 733 94. Saini, R.K.R.; Attarha, S.; da Silva Santos, C.; Kolakowska, J.; Funa, K.; Souchelnytskyi, S. Proteomics of  
734 dedifferentiation of SK-N-BE2 neuroblastoma cells. *Biochemical and Biophysical Research Communications*  
735 **2014**, *454*, 202–209. doi:10.1016/j.bbrc.2014.10.065.
- 736 95. Wrzesinski, K.; Rogowska-Wrzesinska, A.; Kanlaya, R.; Borkowski, K.; Schwämmle, V.; Dai, J.; Joensen,  
737 K.E.; Wojdyla, K.; Carvalho, V.B.; Fey, S.J. The cultural divide: Exponential growth in classical 2D and  
738 metabolic equilibrium in 3D environments. *PLOS One* **2014**, *9*, e106973. doi:10.1371/journal.pone.0106973.

- 739 96. Musrap, N.; Tuccitto, A.; Karagiannis, G.S.; Saraon, P.; Batruch, I.; Diamandis, E.P. Comparative proteomics  
740 of ovarian cancer aggregate formation reveals an increased expression of calcium-activated chloride channel  
741 regulator 1 (CLCA1). *Journal of Biological Chemistry* **2015**, *290*, 17218–17227. doi:10.1074/jbc.m115.639773.
- 742 97. Yue, X.; Lukowski, J.K.; Weaver, E.M.; Skube, S.B.; Hummon, A.B. Quantitative proteomic and  
743 phosphoproteomic comparison of 2D and 3D colon cancer cell culture models. *Journal of Proteome  
744 Research* **2016**, *15*, 4265–4276. doi:10.1021/acs.jproteome.6b00342.
- 745 98. Kim, Y.E.; Jeon, H.J.; Kim, D.; Lee, S.Y.; Kim, K.Y.; Hong, J.; Maeng, P.J.; Kim, K.R.; Kang, D. Quantitative  
746 proteomic analysis of 2D and 3D cultured colorectal cancer cells: Profiling of tankyrase inhibitor  
747 XAV939-induced proteome. *Scientific Reports* **2018**, *8*, 13255. doi:10.1038/s41598-018-31564-6.
- 748 99. Toelle, R.C.; Gaggioli, C.; Dengjel, J. Three-dimensional cell culture conditions affect the  
749 proteome of cancer-associated fibroblasts. *Journal of Proteome Research* **2018**, *17*, 2780–2789.  
750 doi:10.1021/acs.jproteome.8b00237.
- 751 100. Erhart, F.; Weiss, T.; Klingenbrunner, S.; Fischhuber, K.; Reitermaier, R.; Halfmann, A.; Blauensteiner,  
752 B.; Lötsch, D.; Spiegl-kreinecker, S.; Berger, W.; Sialana, F.J.; Lubec, G.; Felzmann, T.; Dohnal, A.; Visus,  
753 C. Spheroid glioblastoma culture conditions as antigen source for dendritic cell-based immunotherapy:  
754 spheroid proteins are survival-relevant targets but can impair immunogenic interferon  $\gamma$  production.  
755 *Cytotherapy* **2019**, *21*, 643–658. doi:10.1016/j.jcyt.2019.03.002.
- 756 101. Gegotek, A.; Atalay, S.; Domingues, P.; Skrzydlewska, E. The differences in the proteome profile of  
757 cannabidiol-treated skin fibroblasts following UVA or UVB irradiation in 2D and 3D cell cultures. *Cells*  
758 **2019**, *8*, 995. doi:10.3390/cells8090995.
- 759 102. Hurrell, T.; Lilley, K.S.; Cromarty, A.D. Proteomic responses of HepG2 cell monolayers and 3D spheroids  
760 to selected hepatotoxins. *Toxicology Letters* **2019**, *300*, 40–50. doi:10.1016/j.toxlet.2018.10.030.
- 761 103. Lee, S.Y.; Park, S.B.; Kim, Y.E.; Yoo, H.M.; Hong, J.; Choi, K.J.; Kim, K.Y.; Kang, D. iTRAQ-based quantitative  
762 proteomic comparison of 2D and 3D adipocyte cell models co-cultured with macrophages using online  
763 2D-nanoLC-ESI-MS/MS. *Scientific Reports* **2019**, *9*, 16746. doi:10.1038/s41598-019-53196-0.
- 764 104. Doron, G.; Klontzas, M.E.; Mantalaris, A.; Guldberg, R.E.; Temenoff, J.S. Multiomics characterization of  
765 mesenchymal stromal cells cultured in monolayer and as aggregates. *Biotechnology and Bioengineering* **2020**,  
766 *117*, 1761–1778. doi:10.1002/bit.27317.
- 767 105. Alldridge, L.; Metodieva, G.; Greenwood, C.; Al-Janabi, K.; Thwaites, L.; Sauven, P.; Metodiev, M. Proteome  
768 profiling of breast tumors by gel electrophoresis and nanoscale electrospray ionization mass spectrometry.  
769 *Journal of Proteome Research* **2008**, *7*, 1458–1469. doi:10.1021/pr7007829.
- 770 106. Cha, S.; Imielinski, M.B.; Rejtar, T.; Richardson, E.A.; Thakur, D.; Sgroi, D.C.; Karger, B.L. *In situ* proteomic  
771 analysis of human breast cancer epithelial cells using laser capture microdissection: Annotation by  
772 protein set enrichment analysis and gene ontology. *Molecular & Cellular Proteomics* **2010**, *9*, 2529–2544.  
773 doi:10.1074/mcp.M110.000398.
- 774 107. Sutton, C.W.; Rustogi, N.; Gurkan, C.; Scally, A.; Loizidou, M.A.; Hadjisavvas, A.; Kyriacou, K. Quantitative  
775 proteomic profiling of matched normal and tumor breast tissues. *Journal of Proteome Research* **2010**,  
776 *9*, 3891–3902. doi:10.1021/pr100113a.
- 777 108. Hill, J.J.; Tremblay, T.L.; Pen, A.; Li, J.; Robotham, A.C.; Lenferink, A.E.G.; Wang, E.; O'Connor-McCourt, M.;  
778 Kelly, J.F. Identification of vascular breast tumor markers by laser capture microdissection and label-free  
779 LC-MS. *Journal of Proteome Research* **2011**, *10*, 2479–2493. doi:10.1021/pr101267k.
- 780 109. Gormley, M.; Tchafa, A.; Meng, R.; Zhong, Z.; Quong, A.A. Proteomic profiling of infiltrating ductal  
781 carcinoma reveals increased cellular interactions with tissue microenvironment. *Journal of Proteome Research*  
782 **2012**, *11*, 2236–2246. doi:10.1021/pr201018y.
- 783 110. Liang, J.L.; Li, S.j.; Liu, X.g.; Li, W.f.; Hao, D.y.; Fan, Z.m. Quantitative proteomic studies  
784 on TNBC in premenopausal patients. *Chemical Research in Chinese Universities* **2013**, *29*, 500–505.  
785 doi:10.1007/s40242-013-2497-9.
- 786 111. Shaheed, S.u.; Rustogi, N.; Scally, A.; Wilson, J.; Thygesen, H.; Loizidou, M.A.; Hadjisavvas, A.; Hanby,  
787 A.; Speirs, V.; Loadman, P.; Linforth, R.; Kyriacou, K.; Sutton, C.W. Identification of stage-specific  
788 breast markers using quantitative proteomics. *Journal of Proteome Research* **2013**, *12*, 5696–5708.  
789 doi:10.1021/pr400662k.

- 790 112. Groessl, M.; Slany, A.; Bileck, A.; Gloessmann, K.; Kreutz, D.; Jaeger, W.; Pfeiler, G.; Gerner, C. Proteome  
791 profiling of breast cancer biopsies reveals a wound healing signature of cancer-associated fibroblasts.  
792 *Journal of Proteome Research* **2014**, *13*, 4773–4782. doi:10.1021/pr500727h.
- 793 113. Panis, C.; Pizzatti, L.; Herrera, A.C.; Corrêa, S.; Binato, R.; Abdelhay, E. Label-free proteomic analysis of  
794 breast cancer molecular subtypes. *Journal of Proteome Research* **2014**, *13*, 4752–4772. doi:10.1021/pr500676x.
- 795 114. Campone, M.; Valo, I.; Jézéquel, P.; Moreau, M.; Boissard, A.; Campion, L.; Lousouarn, D.; Verrielle,  
796 V.; Coqueret, O.; Guette, C. Prediction of recurrence and survival for triple-negative breast cancer  
797 (TNBC) by a protein signature in tissue samples. *Molecular & Cellular Proteomics* **2015**, *14*, 2936–2946.  
798 doi:10.1074/mcp.M115.048967.
- 799 115. Pendharkar, N.; Gajbhiye, A.; Taunk, K.; RoyChoudhury, S.; Dhali, S.; Seal, S.; Mane, A.; Abhang, S.; Santra,  
800 M.K.; Chaudhury, K.; Rapole, S. Quantitative tissue proteomic investigation of invasive ductal carcinoma  
801 of breast with luminal B HER2 positive and HER2 enriched subtypes towards potential diagnostic and  
802 therapeutic biomarkers. *Journal of Proteomics* **2016**, *132*, 112–130. doi:10.1016/j.jprot.2015.11.024.
- 803 116. Pozniak, Y.; Balint-Lahat, N.; Rudolph, J.D.; Lindskog, C.; Katzir, R.; Avivi, C.; Pontén, F.; Ruppín, E.;  
804 Barshack, I.; Geiger, T. System-wide clinical proteomics of breast cancer reveals global remodeling of tissue  
805 homeostasis. *Cell Systems* **2016**, *2*, 172–184. doi:10.1016/j.cels.2016.02.001.
- 806 117. Braakman, R.B.; Stingl, C.; Tilanus-Linthorst, M.M.; Deurzen, C.H.; Timmermans, M.A.; Smid, M.; Foekens,  
807 J.A.; Luidier, T.M.; Martens, J.W.; Umar, A. Proteomic characterization of microdissected breast tissue  
808 environment provides a protein-level overview of malignant transformation. *Proteomics* **2017**, *17*, 1600213.  
809 doi:10.1002/pmic.201600213.
- 810 118. Tang, W.; Zhou, M.; Dorsey, T.H.; Prieto, D.A.; Wang, X.W.; Ruppín, E.; Veenstra, T.D.; Ambs, S. Integrated  
811 proteotranscriptomics of breast cancer reveals globally increased protein-mRNA concordance associated  
812 with subtypes and survival. *Genome Medicine* **2018**, *10*, 94. doi:10.1186/s13073-018-0602-x.
- 813 119. Gomig, T.H.B.; Cavalli, I.J.; de Souza, R.L.R.; Lucena, A.C.R.; Batista, M.; Machado, K.C.; Marchini,  
814 F.K.; Marchi, F.A.; Lima, R.S.; de Andrade Urban, C.; Cavalli, L.R.; de Souza Fonseca Ribeiro, E.M.  
815 High-throughput mass spectrometry and bioinformatics analysis of breast cancer proteomic data. *Data in*  
816 *Brief* **2019**, *25*, 104125. doi:10.1016/j.dib.2019.104125.
- 817 120. Liu, C.; Liu, Y.; Chen, L.; Zhang, M.; Li, W.; Cheng, H.; Zhang, B. Quantitative proteome and lysine  
818 succinylome analyses provide insights into metabolic regulation in breast cancer. *Breast Cancer* **2019**,  
819 *26*, 93–105. doi:10.1007/s12282-018-0893-1.
- 820 121. Lin, Y.; Lin, L.; Fu, F.; Wang, C.; Hu, A.; Xie, J.; Jiang, M.; Wang, Z.; Yang, L.; Zhang, J.; Chen, M.; Li, Y.; Guo,  
821 R.; Yang, P.; Shen, H. Quantitative proteomics reveals stage-specific protein regulation of triple negative  
822 breast cancer. *ResearchSquare* **2020**, preprint. doi:10.21203/rs.2.22780/v1.
- 823 122. Watanabe, M.; Takemasa, I.; Kawaguchi, N.; Miyake, M.; Nishimura, N.; Matsubara, T.; Matsuo,  
824 E.i.; Sekimoto, M.; Nagai, K.; Matsuura, N.; Monden, M.; Nishimura, O. An application of the  
825 2-nitrobenzenesulfonyl method to proteomic profiling of human colorectal carcinoma: A novel approach  
826 for biomarker discovery. *Proteomics: Clinical Applications* **2008**, *2*, 925–935. doi:10.1002/prca.200780111.
- 827 123. Xie, L.Q.; Zhao, C.; Cai, S.J.; Xu, Y.; Huang, L.Y.; Bian, J.S.; Shen, C.P.; Lu, H.J.; Yang, P.Y. Novel proteomic  
828 strategy reveal combined  $\alpha_1$  antitrypsin and cathepsin D as biomarkers for colorectal cancer early screening.  
829 *Journal of Proteome Research* **2010**, *9*, 4701–4709. doi:10.1021/pr100406z.
- 830 124. Zhang, Y.; Ye, Y.; Shen, D.; Jiang, K.; Zhang, H.; Sun, W.; Zhang, J.; Xu, F.; Cui, Z.; Wang, S. Identification of  
831 transgelin-2 as a biomarker of colorectal cancer by laser capture microdissection and quantitative proteome  
832 analysis. *Cancer Science* **2010**, *101*, 523–529. doi:10.1111/j.1349-7006.2009.01424.x.
- 833 125. Besson, D.; Pavageau, A.H.; Valo, I.; Bourreau, A.; Bélanger, A.; Eymert-Morin, C.; Moulière, A.;  
834 Chassevent, A.; Boisdron-Celle, M.; Morel, A.; Solassol, J.; Campone, M.; Gamelin, E.; Barré, B.; Coqueret,  
835 O.; Guette, C. A quantitative proteomic approach of the different stages of colorectal cancer establishes  
836 OLFM4 as a new nonmetastatic tumor marker. *Molecular & Cellular Proteomics* **2011**, *10*, M111.009712.  
837 doi:10.1074/mcp.M111.009712.
- 838 126. Jankova, L.; Chan, C.; Fung, C.L.S.; Song, X.; Kwun, S.Y.; Cowley, M.J.; Kaplan, W.; Dent, O.F.; Bokey, E.L.;  
839 Chapuis, P.H.; Baker, M.S.; Robertson, G.R.; Clarke, S.J.; Molloy, M.P. Proteomic comparison of colorectal  
840 tumours and non-neoplastic mucosa from paired patient samples using iTRAQ mass spectrometry.  
841 *Molecular Biosystems* **2011**, *7*, 2997–3005. doi:10.1039/C1MB05236E.

- 842 127. Mikula, M.; Rubel, T.; Karczmarski, J.; Goryca, K.; Dadlez, M.; Ostrowski, J. Integrating proteomic and  
843 transcriptomic high-throughput surveys for search of new biomarkers of colon tumors. *Functional and*  
844 *Integrative Genomics* **2011**, *11*, 215–224. doi:10.1007/s10142-010-0200-5.
- 845 128. Shi, H.; Hood, K.A.; Hayes, M.T.; Stubbs, R.S. Proteomic analysis of advanced colorectal cancer by laser  
846 capture microdissection and two-dimensional difference gel electrophoresis. *Journal of Proteomics* **2011**,  
847 *75*, 339–351. doi:10.1016/j.jprot.2011.07.025.
- 848 129. Fan, N.J.; Gao, C.F.; Wang, C.S.; Lv, J.J.; Zhao, G.; Sheng, X.H.; Wang, X.L.; Li, D.H.; Liu, Q.Y.; Yin,  
849 J. Discovery and verification of gelsolin as a potential biomarker of colorectal adenocarcinoma in a  
850 Chinese population: Examining differential protein expression using an iTRAQ labelling-based proteomics  
851 approach. *Canadian Journal of Gastroenterology* **2012**, *26*, 41–47. doi:10.1155/2012/645218.
- 852 130. Kang, U.B.; Yeom, J.; Kim, H.J.; Kim, H.; Lee, C. Expression profiling of more than 3500 proteins of  
853 MSS-type colorectal cancer by stable isotope labeling and mass spectrometry. *Journal of Proteomics* **2012**,  
854 *75*, 3050–3062. doi:10.1016/j.jprot.2011.11.021.
- 855 131. Wiśniewski, J.R.; Ostasiewicz, P.; Duś, K.; Zielińska, D.F.; Gnad, F.; Mann, M. Extensive quantitative  
856 remodeling of the proteome between normal colon tissue and adenocarcinoma. *Molecular Systems Biology*  
857 **2012**, *8*, 611. doi:10.1038/msb.2012.44.
- 858 132. Chen, S.; Zhang, J.; Duan, L.; Zhang, Y.; Li, C.; Liu, D.; Ouyang, C.; Lu, F.; Liu, X. Identification of  
859 HnRNP M as a novel biomarker for colorectal carcinoma by quantitative proteomics. *American Journal of*  
860 *Physiology-Gastrointestinal and Liver Physiology* **2014**, *306*, G394–G403. doi:10.1152/ajpgi.00328.2013.
- 861 133. Sethi, M.K.; Thaysen-Andersen, M.; Kim, H.; Park, C.K.; Baker, M.S.; Packer, N.H.; Paik, Y.K.; Hancock,  
862 W.S.; Fanayan, S. Quantitative proteomic analysis of paired colorectal cancer and non-tumorigenic tissues  
863 reveals signature proteins and perturbed pathways involved in CRC progression and metastasis. *Journal of*  
864 *Proteomics* **2015**, *126*, 54–67. doi:10.1016/j.jprot.2015.05.037.
- 865 134. Wiśniewski, J.R.; Duś-Szachniewicz, K.; Ostasiewicz, P.; Ziółkowski, P.; Rakus, D.; Mann, M. Absolute  
866 proteome analysis of colorectal mucosa, adenoma, and cancer reveals drastic changes in fatty acid  
867 metabolism and plasma membrane transporters. *Journal of Proteome Research* **2015**, *14*, 4005–4018.  
868 doi:10.1021/acs.jproteome.5b00523.
- 869 135. Liu, X.; Xu, Y.; Meng, Q.; Zheng, Q.; Wu, J.; Wang, C.; Jia, W.; Figeys, D.; Chang, Y.; Zhou, H. Proteomic  
870 analysis of minute amount of colonic biopsies by enteroscopy sampling. *Biochemical and Biophysical Research*  
871 *Communications* **2016**, *476*, 286–292. doi:10.1016/j.bbrc.2016.05.114.
- 872 136. Peng, F.; Huang, Y.; Li, M.Y.; Li, G.Q.; Huang, H.C.; Guan, R.; Chen, Z.C.; Liang, S.P.; Chen,  
873 Y.H. Dissecting characteristics and dynamics of differentially expressed proteins during multistage  
874 carcinogenesis of human colorectal cancer. *World Journal of Gastroenterology* **2016**, *22*, 4515–4528.  
875 doi:10.3748/wjg.v22.i18.4515.
- 876 137. Cristobal, A.; van den Toorn, H.W.; van de Wetering, M.; Clevers, H.; Heck, A.J.; Mohammed,  
877 S. Personalized proteome profiles of healthy and tumor human colon organoids reveal both  
878 individual diversity and basic features of colorectal cancer. *Cell Reports* **2017**, *18*, 263–274.  
879 doi:10.1016/j.celrep.2016.12.016.
- 880 138. Hao, J.J.; Zhi, X.; Wang, Y.; Zhang, Z.; Hao, Z.; Ye, R.; Tang, Z.; Qian, F.; Wang, Q.; Zhu, J. Comprehensive  
881 proteomic characterization of the human colorectal carcinoma reveals signature proteins and perturbed  
882 pathways. *Scientific Reports* **2017**, *7*, 42436. doi:10.1038/srep42436.
- 883 139. Li, G.; Li, M.; Liang, X.; Xiao, Z.; Zhang, P.; Shao, M.; Peng, F.; Chen, Y.; Li, Y.; Chen, Z. Identifying  
884 DCN and HSPD1 as potential biomarkers in colon cancer using 2D-LC-MS/MS combined with iTRAQ  
885 technology. *Journal of Cancer* **2017**, *8*, 479–489. doi:10.7150/jca.17192.
- 886 140. Nishio, T.; Kurabe, N.; Goto-Inoue, N.; Nakamura, T.; Sugimura, H.; Setou, M.; Maekawa, M.  
887 Immunohistochemical expression analysis of leucine-rich PPR-motif-containing protein (LRPPRC), a  
888 candidate colorectal cancer biomarker identified by shotgun proteomics using iTRAQ. *Clinica Chimica Acta*  
889 **2017**, *471*, 276–282. doi:10.1016/j.cca.2017.06.011.
- 890 141. Quesada-Calvo, F.; Massot, C.; Bertrand, V.; Longuespée, R.; Blétard, N.; Somja, J.; Mazzucchelli, G.;  
891 Smargiasso, N.; Baiwir, D.; De Pauw-Gillet, M.C.; Delvenne, P.; Malaise, M.; Coimbra Marques, C.; Polus,  
892 M.; De Pauw, E.; Meuwis, M.A.; Louis, E. OLFM4, KNG1 and Sec24C identified by proteomics and  
893 immunohistochemistry as potential markers of early colorectal cancer stages. *Clinical Proteomics* **2017**, *14*, 9.  
894 doi:10.1186/s12014-017-9143-3.



- 895 142. Tu, C.; Mojica, W.; Straubinger, R.M.; Li, J.; Shen, S.; Qu, M.; Nie, L.; Roberts, R.; An, B.; Qu, J. Quantitative  
896 proteomic profiling of paired cancerous and normal colon epithelial cells isolated freshly from colorectal  
897 cancer patients. *Proteomics: Clinical Applications* **2017**, *11*, 1600155. doi:10.1002/prca.201600155.
- 898 143. Zhang, Y.; Liu, Y.; Ye, Y.; Shen, D.; Zhang, H.; Huang, H.; Li, S.; Wang, S.; Ren, J. Quantitative proteome  
899 analysis of colorectal cancer-related differential proteins. *Journal of Cancer Research and Clinical Oncology*  
900 **2017**, *143*, 233–241. doi:10.1007/s00432-016-2274-5.
- 901 144. Atak, A.; Khurana, S.; Gollapalli, K.; Reddy, P.J.; Levy, R.; Ben-Salmon, S.; Hollander, D.; Donyo, M.; Heit,  
902 A.; Hotz-Wagenblatt, A.; Biran, H.; Sharan, R.; Rane, S.; Shelar, A.; Ast, G.; Srivastava, S. Quantitative mass  
903 spectrometry analysis reveals a panel of nine proteins as diagnostic markers for colon adenocarcinomas.  
904 *Oncotarget* **2018**, *9*, 13530–13544. doi:10.18632/oncotarget.24418.
- 905 145. Saleem, S.; Tariq, S.; Aleem, I.; ul Shaheed, S.; Tahseen, M.; Atiq, A.; Hassan, S.; Abu Bakar, M.; Khattak,  
906 S.; Syed, A.A.; Ahmad, A.H.; Hussain, M.; Yusuf, M.A.; Sutton, C. Proteomics analysis of colon cancer  
907 progression. *Clinical Proteomics* **2019**, *16*, 44. doi:10.1186/s12014-019-9264-y.
- 908 146. Vasaikar, S.; Huang, C.; Wang, X.; Petyuk, V.A.; Savage, S.R.; Wen, B.; Dou, Y.; Zhang, Y.; Shi, Z.; Arshad,  
909 O.A.; Gritsenko, M.A.; Zimmerman, L.J.; McDermott, J.E.; Clauss, T.R.; Moore, R.J.; Zhao, R.; Monroe,  
910 M.E.; Wang, Y.T.; Chambers, M.C.; Slebos, R.J.; Lau, K.S.; Mo, Q.; Ding, L.; Ellis, M.; Thiagarajan, M.;  
911 Kinsinger, C.R.; Rodriguez, H.; Smith, R.D.; Rodland, K.D.; Liebler, D.C.; Liu, T.; Zhang, B.; Pandey, A.;  
912 Paulovich, A.; Hoofnagle, A.; Mani, D.; Chan, D.W.; Ransohoff, D.F.; Fenyo, D.; Tabb, D.L.; Levine, D.A.;  
913 Boja, E.S.; Kuhn, E.; White, F.M.; Whiteley, G.A.; Zhu, H.; Zhang, H.; Shih, I.M.; Bavarva, J.; Whiteaker,  
914 J.; Ketchum, K.A.; Clauser, K.R.; Ruggles, K.; Elburn, K.; Hannick, L.; Watson, M.; Oberti, M.; Mesri,  
915 M.; Sanders, M.E.; Borucki, M.; Gillette, M.A.; Snyder, M.; Edwards, N.J.; Vatanian, N.; Rudnick, P.A.;  
916 McGarvey, P.B.; Mertins, P.; Townsend, R.R.; Thangudu, R.R.; Rivers, R.C.; Payne, S.H.; Davies, S.R.;  
917 Cai, S.; Stein, S.E.; Carr, S.A.; Skates, S.J.; Madhavan, S.; Hiltke, T.; Chen, X.; Zhao, Y.; Wang, Y.; Zhang,  
918 Z. Proteogenomic analysis of human colon cancer reveals new therapeutic opportunities. *Cell* **2019**,  
919 *177*, 1035–1049. doi:10.1016/j.cell.2019.03.030.
- 920 147. Wang, G.; Yang, Q.; Li, M.; Zhang, Y.; Cai, Y.; Liang, X.; Fu, Y.; Xiao, Z.; Zhou, M.; Xie, Z.; Huang, H.;  
921 Huang, Y.; Chen, Y.; He, Q.; Peng, F.; Chen, Z. Quantitative proteomic profiling of tumor-associated  
922 vascular endothelial cells in colorectal cancer. *Biology Open* **2019**, *8*, bio042838. doi:10.1242/bio.042838.
- 923 148. Li, C.; Hong, Y.; Tan, Y.X.; Zhou, H.; Ai, J.H.; Li, S.J.; Zhang, L.; Xia, Q.C.; Wu, J.R.; Wang, H.Y.;  
924 Zeng, R. Accurate qualitative and quantitative proteomic analysis of clinical hepatocellular carcinoma  
925 using laser capture microdissection coupled with isotope-coded affinity tag and two-dimensional  
926 liquid chromatography mass spectrometry. *Molecular & Cellular Proteomics* **2004**, *3*, 399–409.  
927 doi:10.1074/mcp.M300133-MCP200.
- 928 149. Blanc, J.F.; Lalanne, C.; Plomion, C.; Schmitter, J.M.; Bathany, K.; Gion, J.M.; Bioulac-Sage, P.;  
929 Balabaud, C.; Bonneau, M.; Rosenbaum, J. Proteomic analysis of differentially expressed proteins in  
930 hepatocellular carcinoma developed in patients with chronic viral hepatitis C. *Proteomics* **2005**, *5*, 3778–3789.  
931 doi:10.1002/pmic.200401194.
- 932 150. Li, C.; Tan, Y.X.; Zhou, H.; Ding, S.J.; Li, S.J.; Ma, D.j.; Man, X.b.; Hong, Y.; Zhang, L.; Li, L.; Xia, Q.C.; Wu,  
933 J.R.; Wang, H.Y.; Zeng, R. Proteomic analysis of hepatitis B virus-associated hepatocellular carcinoma:  
934 Identification of potential tumor markers. *Proteomics* **2005**, *5*, 1125–1139. doi:10.1002/pmic.200401141.
- 935 151. Dos Santos, A.; Thiers, V.; Sar, S.; Derian, N.; Bensalem, N.; Yilmaz, F.; Bralet, M.P.; Ducot, B.; Bréchet,  
936 C.; Demaugre, F. Contribution of laser microdissection-based technology to proteomic analysis in  
937 hepatocellular carcinoma developing on cirrhosis. *Proteomics - Clinical Applications* **2007**, *1*, 545–554.  
938 doi:10.1002/prca.200600474.
- 939 152. Sun, W.; Xing, B.; Sun, Y.; Du, X.; Lu, M.; Hao, C.; Lu, Z.; Mi, W.; Wu, S.; Wei, H.; Gao, X.; Zhu, Y.; Jiang,  
940 Y.; Qian, X.; He, F. Proteome analysis of hepatocellular carcinoma by two-dimensional difference gel  
941 electrophoresis: Novel protein markers in hepatocellular carcinoma tissues. *Molecular & Cellular Proteomics*  
942 **2007**, *6*, 1798–1808. doi:10.1074/mcp.M600449-MCP200.
- 943 153. Chaerkady, R.; Harsha, H.C.; Nalli, A.; Gucek, M.; Vivekanandan, P.; Akhtar, J.; Cole, R.N.; Simmers, J.;  
944 Schulick, R.D.; Singh, S.; Torbenson, M.; Pandey, A.; Thuluvath, P.J. A quantitative proteomic approach  
945 for identification of potential biomarkers in hepatocellular carcinoma. *Journal of Proteome Research* **2008**,  
946 *7*, 4289–4298. doi:10.1021/pr800197z.



- 947 154. Roy, L.; LaBoissière, S.; Abdou, E.; Thibault, G.; Hamel, N.; Taheri, M.; Boismenu, D.; Lanoix, J.; Kearney,  
948 R.E.; Paiement, J. Proteomic analysis of the transitional endoplasmic reticulum in hepatocellular carcinoma:  
949 An organelle perspective on cancer. *Biochimica et Biophysica Acta (BBA) - Proteins and Proteomics* **2010**,  
950 *1804*, 1869–1881. doi:10.1016/j.bbapap.2010.05.008.
- 951 155. Lee, Y.Y.; McKinney, K.Q.; Ghosh, S.; Iannitti, D.A.; Martinie, J.B.; Caballes, F.R.; Russo, M.W.; Ahrens,  
952 W.A.; Lundgren, D.H.; Han, D.K.; Bonkovsky, H.L.; Hwang, S.I. Subcellular tissue proteomics of  
953 hepatocellular carcinoma for molecular signature discovery. *Journal of Proteome Research* **2011**, *10*, 5070–5083.  
954 doi:10.1021/pr2005204.
- 955 156. Li, C.; Ruan, H.Q.; Liu, Y.S.; Xu, M.J.; Dai, J.; Sheng, Q.H.; Tan, Y.X.; Yao, Z.Z.; Wang, H.Y.; Wu, J.R.; Zeng,  
956 R. Quantitative proteomics reveal up-regulated protein expression of the SET complex associated with  
957 hepatocellular carcinoma. *Journal of Proteome Research* **2012**, *11*, 871–885. doi:10.1021/pr2006999.
- 958 157. Kimura, K.; Ojima, H.; Kubota, D.; Sakumoto, M.; Nakamura, Y.; Tomonaga, T.; Kosuge, T.; Kondo, T.  
959 Proteomic identification of the macrophage-capping protein as a protein contributing to the malignant  
960 features of hepatocellular carcinoma. *Journal of Proteomics* **2013**, *78*, 362–373. doi:10.1016/j.jprot.2012.10.004.
- 961 158. Megger, D.A.; Bracht, T.; Kohl, M.; Ahrens, M.; Naboulsi, W.; Weber, F.; Hoffmann, A.C.; Stephan, C.;  
962 Kuhlmann, K.; Eisenacher, M.; Schlaak, J.F.; Baba, H.A.; Meyer, H.E.; Sitek, B. Proteomic differences  
963 between hepatocellular carcinoma and nontumorous liver tissue investigated by a combined gel-based  
964 and label-free quantitative proteomics study. *Molecular & Cellular Proteomics* **2013**, *12*, 2006–2020.  
965 doi:10.1074/mcp.M113.028027.
- 966 159. Xu, B.; Wang, F.; Song, C.; Sun, Z.; Cheng, K.; Tan, Y.; Wang, H.; Zou, H. Large-scale proteome quantification  
967 of hepatocellular carcinoma tissues by a three-dimensional liquid chromatography strategy integrated  
968 with sample preparation. *Journal of Proteome Research* **2014**, *13*, 3645–3654. doi:10.1021/pr500200s.
- 969 160. Borlak, J.; Singh, P.; Gazzana, G. Proteome mapping of epidermal growth factor induced hepatocellular  
970 carcinomas identifies novel cell metabolism targets and mitogen activated protein kinase signalling events.  
971 *BMC Genomics* **2015**, *16*, 124. doi:10.1186/s12864-015-1312-z.
- 972 161. Reis, H.; Pütter, C.; Megger, D.A.; Bracht, T.; Weber, F.; Hoffmann, A.C.; Bertram, S.; Wohlschläger, J.;  
973 Hagemann, S.; Eisenacher, M.; Scherag, A.; Schlaak, J.F.; Canbay, A.; Meyer, H.E.; Sitek, B.; Baba, H.A. A  
974 structured proteomic approach identifies 14-3-3Sigma as a novel and reliable protein biomarker in panel  
975 based differential diagnostics of liver tumors. *Biochimica et Biophysica Acta (BBA) - Proteins and Proteomics*  
976 **2015**, *1854*, 641–650. doi:10.1016/j.bbapap.2014.10.024.
- 977 162. Naboulsi, W.; Bracht, T.; Megger, D.A.; Reis, H.; Ahrens, M.; Turewicz, M.; Eisenacher, M.;  
978 Tautges, S.; Canbay, A.E.; Meyer, H.E.; Weber, F.; Baba, H.A.; Sitek, B. Quantitative proteome  
979 analysis reveals the correlation between endocytosis-associated proteins and hepatocellular carcinoma  
980 dedifferentiation. *Biochimica et Biophysica Acta (BBA) - Proteins and Proteomics* **2016**, *1864*, 1579–1585.  
981 doi:10.1016/j.bbapap.2016.08.005.
- 982 163. Naboulsi, W.; Megger, D.A.; Bracht, T.; Kohl, M.; Turewicz, M.; Eisenacher, M.; Voss, D.M.; Schlaak, J.F.;  
983 Hoffmann, A.C.; Weber, F.; Baba, H.A.; Meyer, H.E.; Sitek, B. Quantitative tissue proteomics analysis  
984 reveals versican as potential biomarker for early-stage hepatocellular carcinoma. *Journal of Proteome*  
985 *Research* **2016**, *15*, 38–47. doi:10.1021/acs.jproteome.5b00420.
- 986 164. Qi, Y.; Xu, F.; Chen, L.; Li, Y.; Xu, Z.; Zhang, Y.; Wei, W.; Su, N.; Zhang, T.; Fan, F.; Wang, X.; Qin, X.;  
987 Zhang, L.; Liu, Y.; Xu, P. Quantitative proteomics reveals FLNC as a potential progression marker for the  
988 development of hepatocellular carcinoma. *Oncotarget* **2016**, *7*, 68242–68252. doi:10.18632/oncotarget.11921.
- 989 165. Guo, J.; Jing, R.; Zhong, J.H.; Dong, X.; Li, Y.X.; Liu, Y.K.; Huang, T.R.; Zhang, C.Y. Identification of CD14  
990 as a potential biomarker of hepatocellular carcinoma using iTRAQ quantitative proteomics. *Oncotarget*  
991 **2017**, *8*, 62011–62028. doi:10.18632/oncotarget.18782.
- 992 166. Gao, Y.; Wang, X.; Sang, Z.; Li, Z.; Liu, F.; Mao, J.; Yan, D.; Zhao, Y.; Wang, H.; Li, P.; Ying, X.; Zhang, X.; He,  
993 K.; Wang, H. Quantitative proteomics by SWATH-MS reveals sophisticated metabolic reprogramming in  
994 hepatocellular carcinoma tissues. *Scientific Reports* **2017**, *7*, 45913. doi:10.1038/srep45913.
- 995 167. Qiao, Z.; Pan, X.; Parlayan, C.; Ojima, H.; Kondo, T. Proteomic study of hepatocellular carcinoma using a  
996 novel modified aptamer-based array (SOMAScan™) platform. *Biochimica et Biophysica Acta (BBA) - Proteins*  
997 *and Proteomics* **2017**, *1865*, 434–443. doi:10.1016/j.bbapap.2016.09.011.

168. Wang, Y.; Liu, H.; Liang, D.; Huang, Y.; Zeng, Y.; Xing, X.; Xia, J.; Lin, M.; Han, X.; Liao, N.; Liu, X.; Liu, J. Reveal the molecular signatures of hepatocellular carcinoma with different sizes by iTRAQ based quantitative proteomics. *Journal of Proteomics* **2017**, *150*, 230–241. doi:10.1016/j.jprot.2016.09.008.
169. Buczak, K.; Ori, A.; Kirkpatrick, J.M.; Holzer, K.; Dauch, D.; Roessler, S.; Endris, V.; Lasitschka, F.; Parca, L.; Schmidt, A.; Zender, L.; Schirmacher, P.; Krijgsveld, J.; Singer, S.; Beck, M. Spatial tissue proteomics quantifies inter- and intratumor heterogeneity in hepatocellular carcinoma (HCC). *Molecular & Cellular Proteomics* **2018**, *17*, 810–825. doi:10.1074/mcp.RA117.000189.
170. Yang, J.; Xie, Q.; Zhou, H.; Chang, L.; Wei, W.; Wang, Y.; Li, H.; Deng, Z.; Xiao, Y.; Wu, J.; Xu, P.; Hong, X. Proteomic analysis and NIR-II imaging of MCM2 protein in hepatocellular carcinoma. *Journal of Proteome Research* **2018**, *17*, 2428–2439. doi:10.1021/acs.jproteome.8b00181.
171. Berndt, N.; Egner, A.; Mastrobuni, G.; Vvedenskaya, O.; Fragoulis, A.; Dugourd, A.; Bulik, S.; Pietzke, M.; Bielow, C.; van Gassel, R.; Damink, S.W.O.; Erdem, M.; Saez-Rodriguez, J.; Holzhütter, H.G.; Kempa, S.; Cramer, T. Kinetic modelling of quantitative proteome data predicts metabolic reprogramming of liver cancer. *British Journal of Cancer* **2020**, *122*, 233–244. doi:10.1038/s41416-019-0659-3.
172. Gao, Q.; Zhu, H.; Dong, L.; Shi, W.; Chen, R.; Song, Z.; Huang, C.; Li, J.; Dong, X.; Zhou, Y.; Liu, Q.; Ma, L.; Wang, X.; Zhou, J.; Liu, Y.; Boja, E.; Robles, A.I.; Ma, W.; Wang, P.; Li, Y.; Ding, L.; Wen, B.; Zhang, B.; Rodriguez, H.; Gao, D.; Zhou, H.; Fan, J. Integrated proteogenomic characterization of HBV-related hepatocellular carcinoma. *Cell* **2019**, *179*, 561–577. doi:10.1016/j.cell.2019.08.052.
173. Jiang, Y.; Sun, A.; Zhao, Y.; Ying, W.; Sun, H.; Yang, X.; Xing, B.; Sun, W.; Ren, L.; Hu, B.; Li, C.; Zhang, L.; Qin, G.; Zhang, M.; Chen, N.; Zhang, M.; Huang, Y.; Zhou, J.; Zhao, Y.; Liu, M.; Zhu, X.; Qiu, Y.; Sun, Y.; Huang, C.; Yan, M.; Wang, M.; Liu, W.; Tian, F.; Xu, H.; Zhou, J.; Wu, Z.; Shi, T.; Zhu, W.; Qin, J.; Xie, L.; Fan, J.; Qian, X.; He, F.; He, F.; Qian, X.; Qin, J.; Jiang, Y.; Ying, W.; Sun, W.; Zhu, Y.; Zhu, W.; Wang, Y.; Yang, D.; Liu, W.; Liu, Q.; Yang, X.; Zhen, B.; Wu, Z.; Fan, J.; Sun, H.; Qian, J.; Hong, T.; Shen, L.; Xing, B.; Yang, P.; Shen, H.; Zhang, L.; Cheng, S.; Cai, J.; Zhao, X.; Sun, Y.; Xiao, T.; Mao, Y.; Chen, X.; Wu, D.; Chen, L.; Dong, J.; Deng, H.; Tan, M.; Wu, Z.; Zhao, Q.; Shen, Z.; Chen, X.; Gao, Y.; Sun, W.; Wang, T.; Liu, S.; Lin, L.; Zi, J.; Lou, X.; Zeng, R.; Wu, Y.; Cai, S.; Jiang, B.; Chen, A.; Li, Z.; Yang, F.; Chen, X.; Sun, Y.; Wang, Q.; Zhang, Y.; Wang, G.; Chen, Z.; Qin, W.; Li, Z.; Chinese Human Proteome Project Consortium (CNHPP). Proteomics identifies new therapeutic targets of early-stage hepatocellular carcinoma. *Nature* **2019**, *567*, 257–261. doi:10.1038/s41586-019-0987-8.
174. Zhu, Y.; Zhu, J.; Lu, C.; Zhang, Q.; Xie, W.; Sun, P.; Dong, X.; Yue, L.; Sun, Y.; Yi, X.; Zhu, T.; Ruan, G.; Aebbersold, R.; Huang, S.; Guo, T. Identification of protein abundance changes in hepatocellular carcinoma tissues using PCT-SWATH. *Proteomics: Clinical Applications* **2019**, *13*, 1700179. doi:10.1002/prca.201700179.
175. Gao, H.; Zhang, F.; Liang, S.; Zhang, Q.; Lyu, M.; Qian, L.; Liu, W.; Ge, W.; Chen, C.; Yi, X.; Zhu, J.; Lu, C.; Sun, P.; Liu, K.; Zhu, Y.; Guo, T. Accelerated lysis and proteolytic digestion of biopsy-level fresh-frozen and FFPE tissue samples using pressure cycling technology. *Journal of Proteome Research* **2020**, *19*, 1982–1990. doi:10.1021/acs.jproteome.9b00790.
176. Shin, H.; Cha, H.J.; Lee, M.J.; Na, K.; Park, D.; Kim, C.Y.; Han, D.H.; Kim, H.; Paik, Y.K. Identification of ALDH6A1 as a potential molecular signature in hepatocellular carcinoma via quantitative profiling of the mitochondrial proteome. *Journal of Proteome Research* **2020**, *19*, 1684–1695. doi:10.1021/acs.jproteome.9b00846.
177. Li, C.; Xiao, Z.; Chen, Z.; Zhang, X.; Li, J.; Wu, X.; Li, X.; Yi, H.; Li, M.; Zhu, G.; Liang, S. Proteome analysis of human lung squamous carcinoma. *Proteomics* **2006**, *6*, 547–558. doi:10.1002/pmic.200500256.
178. Kikuchi, T.; Hassanein, M.; Amann, J.M.; Liu, Q.; Slebos, R.J.C.; Rahman, S.M.J.; Kaufman, J.M.; Zhang, X.; Hoeksema, M.D.; Harris, B.K.; Li, M.; Shyr, Y.; Gonzalez, A.L.; Zimmerman, L.J.; Liebler, D.C.; Massion, P.P.; Carbone, D.P. In-depth proteomic analysis of nonsmall cell lung cancer to discover molecular targets and candidate biomarkers. *Molecular & Cellular Proteomics* **2012**, *11*, 916–932. doi:10.1074/mcp.M111.015370.
179. Yan, X.; Lan-Qin, C.; Long-Yu, J.; Zhu-Chu, C.; Gu-Qing, Z.; Can-E, T.; Guo-Qing, L.; Chao-Jun, D.; Fang, P.; Zhi-Qiang, X.; Cui, L. Quantitative proteomic study of human lung squamous carcinoma and normal bronchial epithelial acquired by laser capture microdissection. *Journal of Biomedicine and Biotechnology* **2012**, *2012*, 510418. doi:10.1155/2012/510418.
180. Zeng, G.Q.; Zhang, P.F.; Deng, X.; Yu, F.L.; Li, C.; Xu, Y.; Yi, H.; Li, M.Y.; Hu, R.; Zuo, J.H.; Li, X.H.; Wan, X.X.; Qu, J.Q.; He, Q.Y.; Li, J.H.; Ye, X.; Chen, Y.; Li, J.Y.; Xiao, Z.Q. Identification of candidate biomarkers

- 1050 for early detection of human lung squamous cell cancer by quantitative proteomics. *Molecular & Cellular*  
1051 *Proteomics* **2012**, *11*, M111.013946. doi:10.1074/mcp.M111.013946.
- 1052 181. Zhang, P.F.; Zeng, G.Q.; Yi, L.Z.; Liu, J.P.; Wan, X.X.; Qu, J.Q.; Li, J.H.; Li, C.; Tang, C.E.; Hu, R.; Ye,  
1053 X.; Chen, Y.; Chen, Z.C.; Xiao, Z.Q. Identification of integrin  $\beta 1$  as a prognostic biomarker for human  
1054 lung adenocarcinoma using 2D-LC-MS/MS combined with iTRAQ technology. *Oncology Reports* **2013**,  
1055 *30*, 341–349. doi:10.3892/or.2013.2477.
- 1056 182. Lihong, H.; Linlin, G.; Yiping, G.; Yang, S.; Xiaoyu, Q.; Zhuzhu, G.; Xiaohan, Y.; Xin, Z.; Liyan, X.; Shujuan,  
1057 S. Proteomics approaches for identification of tumor relevant protein targets in pulmonary squamous cell  
1058 carcinoma by 2D-DIGE-MS. *PLOS One* **2014**, *9*, e95121. doi:10.1371/journal.pone.0095121.
- 1059 183. Li, L.; Wei, Y.; To, C.; Zhu, C.Q.; Tong, J.; Pham, N.A.; Taylor, P.; Ignatchenko, V.; Ignatchenko, A.; Zhang,  
1060 W.; Wang, D.; Yanagawa, N.; Li, M.; Pintilie, M.; Liu, G.; Muthuswamy, L.; Shepherd, F.A.; Tsao, M.S.;  
1061 Kislinger, T.; Moran, M.F. Integrated Omic analysis of lung cancer reveals metabolism proteome signatures  
1062 with prognostic impact. *Nature Communications* **2014**, *5*, 5469. doi:10.1038/ncomms6469.
- 1063 184. Zhang, X.; Li, W.; Hou, Y.; Niu, Z.; Zhong, Y.; Zhang, Y.; Yang, S. Comparative membrane proteomic  
1064 analysis between lung adenocarcinoma and normal tissue by iTRAQ labeling mass spectrometry. *American*  
1065 *Journal of Translational Research* **2014**, *6*, 267–280.
- 1066 185. Zhuo, H.; Lyu, Z.; Su, J.; He, J.; Pei, Y.; Cheng, X.; Zhou, N.; Lu, X.; Zhou, S.; Zhao, Y. Effect of lung  
1067 squamous cell carcinoma tumor microenvironment on the CD105+ endothelial cell proteome. *Journal of*  
1068 *Proteome Research* **2014**, *13*, 4717–4729. doi:10.1021/pr5006229.
- 1069 186. Kato, Y.; Nakamura, H.; Tojo, H.; Nomura, M.; Nagao, T.; Kawamura, T.; Kodama, T.; Ohira, T.; Ikeda,  
1070 N.; Fehniger, T.; Marko-Varga, G.; Nishimura, T.; Kato, H. A proteomic profiling of laser-microdissected  
1071 lung adenocarcinoma cells of early lepidic-types. *Clinical and Translational Medicine* **2015**, *4*, 24.  
1072 doi:10.1186/s40169-015-0064-3.
- 1073 187. Backes, C.; Ludwig, N.; Leidinger, P.; Huwer, H.; Tenzer, S.; Fehlmann, T.; Franke, A.; Meese, E.; Lenhof,  
1074 H.P.; Keller, A. Paired proteomics, transcriptomics and miRNomics in non-small cell lung cancers: Known  
1075 and novel signaling cascades. *Oncotarget* **2016**, *7*, 71514–71525. doi:10.18632/oncotarget.11723.
- 1076 188. Fahrman, J.F.; Grapov, D.; Phinney, B.S.; Stroble, C.; DeFelice, B.C.; Rom, W.; Gandara, D.R.; Zhang, Y.;  
1077 Fiehn, O.; Pass, H.; Miyamoto, S. Proteomic profiling of lung adenocarcinoma indicates heightened DNA  
1078 repair, antioxidant mechanisms and identifies LASP1 as a potential negative predictor of survival. *Clinical*  
1079 *Proteomics* **2016**, *13*, 31. doi:10.1186/s12014-016-9132-y.
- 1080 189. Jin, H.; Cheng, X.; Pei, Y.; Fu, J.; Lyu, Z.; Peng, H.; Yao, Q.; Jiang, Y.; Luo, L.; Zhuo, H. Identification and  
1081 verification of transgelin-2 as a potential biomarker of tumor-derived lung-cancer endothelial cells by  
1082 comparative proteomics. *Journal of Proteomics* **2016**, *136*, 77–88. doi:10.1016/j.jprot.2015.12.012.
- 1083 190. Hsu, C.H.; Hsu, C.W.; Hsueh, C.; Wang, C.L.; Wu, Y.C.; Wu, C.C.; Liu, C.C.; Yu, J.S.; Chang, Y.S.; Yu, C.J.  
1084 Identification and characterization of potential biomarkers by quantitative tissue proteomics of primary  
1085 lung adenocarcinoma. *Molecular & Cellular Proteomics* **2016**, *15*, 2396–2410. doi:10.1074/mcp.M115.057026.
- 1086 191. Tenzer, S.; Leidinger, P.; Backes, C.; Huwer, H.; Hildebrandt, A.; Lenhof, H.P.; Wesse, T.; Franke, A.; Meese,  
1087 E.; Keller, A. Integrated quantitative proteomic and transcriptomic analysis of lung tumor and control  
1088 tissue: A lung cancer showcase. *Oncotarget* **2016**, *7*, 14857–14870. doi:10.18632/oncotarget.7562.
- 1089 192. Fahrman, J.F.; Grapov, D.; Wanichthanarak, K.; DeFelice, B.C.; Salemi, M.R.; Rom, W.N.; Gandara, D.R.;  
1090 Phinney, B.S.; Fiehn, O.; Pass, H.; Miyamoto, S. Integrated metabolomics and proteomics highlight  
1091 altered nicotinamide and polyamine pathways in lung adenocarcinoma. *Carcinogenesis* **2017**, *38*, 271–280.  
1092 doi:10.1093/carcin/bgw205.
- 1093 193. Li, W.; Zhang, X.; Wang, W.; Sun, R.; Liu, B.; Ma, Y.; Zhang, W.; Ma, L.; Jin, Y.; Yang, S. Quantitative  
1094 proteomics analysis of mitochondrial proteins in lung adenocarcinomas and normal lung tissue using  
1095 iTRAQ and tandem mass spectrometry. *American Journal of Translational Research* **2017**, *9*, 3918–3934.
- 1096 194. Stewart, P.A.; Fang, B.; Slebos, R.J.C.; Zhang, G.; Borne, A.L.; Fellows, K.; Teer, J.K.; Chen, Y.A.; Welsh,  
1097 E.; Eschrich, S.A.; Haura, E.B.; Koomen, J.M. Relative protein quantification and accessible biology  
1098 in lung tumor proteomes from four LC-MS/MS discovery platforms. *Proteomics* **2017**, *17*, 1600300.  
1099 doi:10.1002/pmic.201600300.
- 1100 195. Wang, K.; Li, H.; Chen, R.; Zhang, Y.; Sun, X.X.; Huang, W.; Bian, H.; Chen, Z.N. Combination of CALR and  
1101 PDIA3 is a potential prognostic biomarker for non-small cell lung cancer. *Oncotarget* **2017**, *8*, 96945–96957.  
1102 doi:10.18632/oncotarget.18547.

- 1103 196. Yang, S.; Chen, L.; Chan, D.W.; Li, Q.K.; Zhang, H. Protein signatures of molecular pathways in non-small  
1104 cell lung carcinoma (NSCLC): comparison of glycoproteomics and global proteomics. *Clinical Proteomics*  
1105 **2017**, *14*, 31. doi:10.1186/s12014-017-9166-9.
- 1106 197. Lu, Z.; Hu, L.; Evers, S.; Chen, J.; Shen, Y. Differential expression profiling of human pancreatic  
1107 adenocarcinoma and healthy pancreatic tissue. *Proteomics* **2004**, *4*, 3975–3988. doi:10.1002/pmic.200300863.
- 1108 198. Chen, R.; Yi, E.C.; Donohoe, S.; Pan, S.; Eng, J.; Cooke, K.; Crispin, D.A.; Lane, Z.; Goodlett,  
1109 D.R.; Bronner, M.P.; Aebersold, R.; Brentnall, T.A. Pancreatic cancer proteome: The proteins that  
1110 underlie invasion, metastasis, and immunologic escape. *Gastroenterology* **2005**, *129*, 1187–1197.  
1111 doi:10.1053/j.gastro.2005.08.001.
- 1112 199. Crnogorac-Jurcevic, T.; Gangeswaran, R.; Bhakta, V.; Capurso, G.; Lattimore, S.; Akada, M.; Sunamura,  
1113 M.; Prime, W.; Campbell, F.; Brentnall, T.A.; Costello, E.; Neoptolemos, J.; Lemoine, N.R. Proteomic  
1114 analysis of chronic pancreatitis and pancreatic adenocarcinoma. *Gastroenterology* **2005**, *129*, 1454–1463.  
1115 doi:10.1053/j.gastro.2005.08.012.
- 1116 200. Cui, Y.; Tian, M.; Zong, M.; Teng, M.; Chen, Y.; Lu, J.; Jiang, J.; Liu, X.; Han, J. Proteomic analysis of  
1117 pancreatic ductal adenocarcinoma compared with normal adjacent pancreatic tissue and pancreatic benign  
1118 cystadenoma. *Pancreatology* **2009**, *9*, 89–98. doi:10.1159/000178879.
- 1119 201. McKinney, K.Q.; Lee, Y.Y.; Choi, H.S.; Groseclose, G.; Iannitti, D.A.; Martinie, J.B.; Russo, M.W.; Lundgren,  
1120 D.H.; Han, D.K.; Bonkovsky, H.L.; Hwang, S.I. Discovery of putative pancreatic cancer biomarkers using  
1121 subcellular proteomics. *Journal of Proteomics* **2011**, *74*, 79–88. doi:10.1016/j.jprot.2010.08.006.
- 1122 202. Pan, S.; Chen, R.; Stevens, T.; Bronner, M.P.; May, D.; Tamura, Y.; McIntosh, M.W.; Brentnall,  
1123 T.A. Proteomics portrait of archival lesions of chronic pancreatitis. *PLOS One* **2011**, *6*, e27574.  
1124 doi:10.1371/journal.pone.0027574.
- 1125 203. Turtoi, A.; Musmeci, D.; Wang, Y.; Dumont, B.; Somja, J.; Bevilacqua, G.; De Pauw, E.; Delvenne,  
1126 P.; Castronovo, V. Identification of novel accessible proteins bearing diagnostic and therapeutic  
1127 potential in human pancreatic ductal adenocarcinoma. *Journal of Proteome Research* **2011**, *10*, 4302–4313.  
1128 doi:10.1021/pr200527z.
- 1129 204. Kojima, K.; Bowersock, G.J.; Kojima, C.; Klug, C.A.; Grizzle, W.E.; Mobley, J.A. Validation of a robust  
1130 proteomic analysis carried out on formalin-fixed paraffin-embedded tissues of the pancreas obtained from  
1131 mouse and human. *Proteomics* **2012**, *12*, 3393–3402. doi:10.1002/pmic.201100663.
- 1132 205. Kawahara, T.; Hotta, N.; Ozawa, Y.; Kato, S.; Kano, K.; Yokoyama, Y.; Nagino, M.; Takahashi, T.; Yanagisawa,  
1133 K. Quantitative proteomic profiling identifies DPYSL3 as pancreatic ductal adenocarcinoma-associated  
1134 molecule that regulates cell adhesion and migration by stabilization of focal adhesion complex. *PLOS One*  
1135 **2013**, *8*, e79654. doi:10.1371/journal.pone.0079654.
- 1136 206. Kosanam, H.; Prassas, I.; Chrystoja, C.C.; Soleas, I.; Chan, A.; Dimitromanolakis, A.; Blasutig, I.M.;  
1137 Rückert, F.; Gruetzmänn, R.; Pilarsky, C.; Maekawa, M.; Brand, R.; Diamandis, E.P. Laminin,  
1138 gamma 2 (LAMC2): A promising new putative pancreatic cancer biomarker identified by proteomic  
1139 analysis of pancreatic adenocarcinoma tissues. *Molecular & Cellular Proteomics* **2013**, *12*, 2820–2832.  
1140 doi:10.1074/mcp.M112.023507.
- 1141 207. Wang, W.S.; Liu, X.H.; Liu, L.X.; Jin, D.Y.; Yang, P.Y.; Wang, X.L. Identification of proteins implicated in the  
1142 development of pancreatic cancer-associated diabetes mellitus by iTRAQ-based quantitative proteomics.  
1143 *Journal of Proteomics* **2013**, *84*, 52–60. doi:10.1016/j.jprot.2013.03.031.
- 1144 208. Yu, J.; Kim, K.; Kang, M.; Kim, H.; Kim, S.W.; Jang, J.Y.; Kim, Y. Development of candidate biomarkers  
1145 for pancreatic ductal adenocarcinoma using multiple reaction monitoring. *Biotechnology and Bioprocess*  
1146 *Engineering* **2013**, *18*, 1038–1047. doi:10.1007/s12257-013-0421-2.
- 1147 209. Zhu, J.; Nie, S.; Wu, J.; Lubman, D.M. Target proteomic profiling of frozen pancreatic CD24+  
1148 adenocarcinoma tissues by immuno-laser capture microdissection and nano-LC-MS/MS. *Journal of*  
1149 *Proteome Research* **2013**, *12*, 2791–2804. doi:10.1021/pr400139c.
- 1150 210. Iuga, C.; Seicean, A.; Iancu, C.; Buiga, R.; Sappa, P.K.; Völker, U.; Hammer, E. Proteomic identification  
1151 of potential prognostic biomarkers in resectable pancreatic ductal adenocarcinoma. *Proteomics* **2014**,  
1152 *14*, 945–955. doi:10.1002/pmic.201300402.
- 1153 211. Britton, D.; Zen, Y.; Quaglia, A.; Selzer, S.; Mitra, V.; Lößner, C.; Jung, S.; Böhm, G.; Schmid, P.; Prefot,  
1154 P.; Hoehle, C.; Koncarevic, S.; Gee, J.; Nicholson, R.; Ward, M.; Castellano, L.; Stebbing, J.; Zucht, H.D.;  
1155 Sarker, D.; Heaton, N.; Pike, I. Quantification of pancreatic cancer proteome and phosphorylome: Indicates



- 1156 molecular events likely contributing to cancer and activity of drug targets. *PLOS One* **2014**, *9*, e90948.  
1157 doi:10.1371/journal.pone.0090948.
- 1158 212. Mirus, J.E.; Zhang, Y.; Hollingsworth, M.A.; Solan, J.L.; Lampe, P.D.; Hingorani, S.R. Spatiotemporal  
1159 proteomic analyses during pancreas cancer progression identifies serine/threonine stress kinase 4 (STK4)  
1160 as a novel candidate biomarker for early stage disease. *Molecular & Cellular Proteomics* **2014**, *13*, 3484–3496.  
1161 doi:10.1074/mcp.M113.036517.
- 1162 213. Boj, S.; Hwang, C.I.; Baker, L.; Chio, I.; Engle, D.; Corbo, V.; Jager, M.; Ponz-Sarvisé, M.; Tiriác, H.; Spector,  
1163 M.; Gracanin, A.; Oni, T.; Yu, K.; van Boxtel, R.; Huch, M.; Rivera, K.; Wilson, J.; Feigin, M.; Öhlund, D.;  
1164 Handly-Santana, A.; Ardito-Abraham, C.; Ludwig, M.; Elyada, E.; Alagesan, B.; Biffi, G.; Yordanov, G.;  
1165 Delcuze, B.; Creighton, B.; Wright, K.; Park, Y.; Morsink, F.; Molenaar, I.; Borel Rinkes, I.; Cuppen, E.; Hao,  
1166 Y.; Jin, Y.; Nijman, I.; Iacobuzio-Donahue, C.; Leach, S.; Pappin, D.; Hammell, M.; Klimstra, D.; Basturk,  
1167 O.; Hruban, R.; Offerhaus, G.; Vries, R.; Clevers, H.; Tuveson, D. Organoid models of human and mouse  
1168 ductal pancreatic cancer. *Cell* **2015**, *160*, 324–338. doi:10.1016/j.cell.2014.12.021.
- 1169 214. Kuo, K.K.; Kuo, C.J.; Chiu, C.Y.; Liang, S.S.; Huang, C.H.; Chi, S.W.; Tsai, K.B.; Chen, C.Y.; Hsi, E.; Cheng,  
1170 K.H.; Chiou, S.H. Quantitative proteomic analysis of differentially expressed protein profiles involved in  
1171 pancreatic ductal adenocarcinoma. *Pancreas* **2016**, *45*, 71–83. doi:10.1097/MPA.0000000000000388.
- 1172 215. Coleman, O.; Henry, M.; O'Neill, F.; Roche, S.; Swan, N.; Boyle, L.; Murphy, J.; Meiller, J.; Conlon, N.T.;  
1173 Geoghegan, J.; Conlon, K.C.; Lynch, V.; Straubinger, N.L.; Straubinger, R.M.; McVey, G.; Moriarty, M.;  
1174 Meleady, P.; Clynes, M. A comparative quantitative LC-MS/MS profiling analysis of human pancreatic  
1175 adenocarcinoma, adjacent-normal tissue, and patient-derived tumour xenografts. *Proteomes* **2018**, *6*, 45.  
1176 doi:10.3390/proteomes6040045.
- 1177 216. Song, Y.; Wang, Q.; Wang, D.; Li, J.; Yang, J.; Li, H.; Wang, X.; Jin, X.; Jing, R.; Yang, J.H.; Su, H.  
1178 Label-free quantitative proteomics unravels carboxypeptidases as the novel biomarker in pancreatic  
1179 ductal adenocarcinoma. *Translational Oncology* **2018**, *11*, 691–699. doi:10.1016/j.tranon.2018.03.005.
- 1180 217. Zhou, Q.; Andersson, R.; Hu, D.; Bauden, M.; Kristl, T.; Sasor, A.; Pawłowski, K.; Pla, I.; Hilmersson, K.S.;  
1181 Zhou, M.; Lu, F.; Marko-Varga, G.; Ansari, D. Quantitative proteomics identifies brain acid soluble protein  
1182 1 (BASP1) as a prognostic biomarker candidate in pancreatic cancer tissue. *EBioMedicine* **2019**, *43*, 282–294.  
1183 doi:10.1016/j.ebiom.2019.04.008.
- 1184 218. Garbis, S.D.; Tyrirtzis, S.I.; Roumeliotis, T.; Zerefos, P.; Giannopoulou, E.G.; Vlahou, A.; Kossida, S.;  
1185 Diaz, J.; Vourekas, S.; Tamvakopoulos, C.; Pavlakis, K.; Sanoudou, D.; Constantinides, C.A. Search for  
1186 potential markers for prostate cancer diagnosis, prognosis and treatment in clinical tissue specimens using  
1187 amine-specific isobaric tagging (iTRAQ) with two-dimensional liquid chromatography and tandem mass  
1188 spectrometry. *Journal of Proteome Research* **2008**, *7*, 3146–3158. doi:10.1021/pr800060r.
- 1189 219. Khan, A.P.; Poisson, L.M.; Bhat, V.B.; Fermin, D.; Zhao, R.; Kalyana-Sundaram, S.; Michailidis, G.;  
1190 Nesvizhskii, A.I.; Omenn, G.S.; Chinnaiyan, A.M.; Sreekumar, A. Quantitative proteomic profiling of  
1191 prostate cancer reveals a role for miR-128 in prostate cancer. *Molecular & Cellular Proteomics* **2010**, *9*, 298–312.  
1192 doi:10.1074/mcp.M900159-MCP200.
- 1193 220. Han, Z.d.; Zhang, Y.q.; He, H.c.; Dai, Q.s.; Qin, G.q.; Chen, J.h.; Cai, C.; Fu, X.; Bi, X.c.; Zhu, J.g.; Liao,  
1194 D.j.; Lu, X.p.; Mo, Z.y.; Zhu, Y.p.; Zhong, W.d. Identification of novel serological tumor markers for  
1195 human prostate cancer using integrative transcriptome and proteome analysis. *Medical Oncology* **2012**,  
1196 *29*, 2877–2888. doi:10.1007/s12032-011-0149-9.
- 1197 221. Jiang, F.n.; He, H.c.; Zhang, Y.q.; Yang, D.l.; Huang, J.h.; Zhu, Y.x.; Mo, R.j.; Chen, G.; Yang, S.b.; Chen, Y.r.;  
1198 Zhong, W.d.; Zhou, W.l. An integrative proteomics and interaction network-based classifier for prostate  
1199 cancer diagnosis. *PLOS One* **2013**, *8*, e63941. doi:10.1371/journal.pone.0063941.
- 1200 222. Liu, Y.; Chen, J.; Sethi, A.; Li, Q.K.; Chen, L.; Collins, B.; Gillet, L.C.J.; Wollscheid, B.; Zhang, H.;  
1201 Aebersold, R. Glycoproteomic analysis of prostate cancer tissues by SWATH mass spectrometry discovers  
1202 N-acylethanolamine acid amidase and protein tyrosine kinase 7 as signatures for tumor aggressiveness.  
1203 *Molecular & Cellular Proteomics* **2014**, *13*, 1753–1768. doi:10.1074/mcp.M114.038273.
- 1204 223. Chen, C.; Zhang, L.G.; Liu, J.; Han, H.; Chen, N.; Yao, A.L.; Kang, S.S.; Gao, W.X.; Shen, H.; Zhang, L.J.; Li,  
1205 Y.P.; Cao, F.H.; Li, Z.G. Bioinformatics analysis of differentially expressed proteins in prostate cancer based  
1206 on proteomics data. *OncoTargets and Therapy* **2016**, *9*, 1545–1557. doi:10.2147/OTT.S98807.
- 1207 224. Iglesias-Gato, D.; Wikström, P.; Tyanova, S.; Lavalley, C.; Thysell, E.; Carlsson, J.; Hägglöf, C.; Cox, J.;  
1208 Andrén, O.; Stattin, P.; Egevad, L.; Widmark, A.; Bjartell, A.; Collins, C.C.; Bergh, A.; Geiger, T.; Mann,



- 1209 M.; Flores-Morales, A. The proteome of primary prostate cancer. *European Urology* **2016**, *69*, 942–952.  
1210 doi:10.1016/j.eururo.2015.10.053.
- 1211 225. Guo, T.; Li, L.; Zhong, Q.; Rupp, N.J.; Charmpi, K.; Wong, C.E.; Wagner, U.; Rueschoff, J.H.; Jochum, W.;  
1212 Fankhauser, C.D.; Saba, K.; Poyet, C.; Wild, P.J.; Aebersold, R.; Beyer, A. Multi-region proteome analysis  
1213 quantifies spatial heterogeneity of prostate tissue biomarkers. *Life Science Alliance* **2018**, *1*, e201800042.  
1214 doi:10.26508/lsa.201800042.
- 1215 226. Latonen, L.; Afyounian, E.; Jylha, A.; Nattinen, J.; Aapola, U.; Annala, M.; Kivinummi, K.K.; Tammela,  
1216 T.T.L.; Beuerman, R.W.; Uusitalo, H.; Nykter, M.; Visakorpi, T. Integrative proteomics in prostate cancer  
1217 uncovers robustness against genomic and transcriptomic aberrations during disease progression. *Nature*  
1218 *Communications* **2018**, *9*, 1176. doi:10.1038/s41467-018-03573-6.
- 1219 227. Martiny, P.B.; Alcoba, D.D.; Neto, B.S.; Carvalho, P.C.; Brum, I.S. A proteomic glimpse into the oncogenesis  
1220 of prostate cancer. *Journal of Applied Biomedicine* **2018**, *16*, 328–336. doi:10.1016/j.jab.2018.05.003.
- 1221 228. Kawahara, R.; Recuero, S.; Nogueira, F.C.S.; Domont, G.B.; Leite, K.R.M.; Srougi, M.; Thaysen-Andersen,  
1222 M.; Palmisano, G. Tissue proteome signatures associated with five grades of prostate cancer and benign  
1223 prostatic hyperplasia. *Proteomics* **2019**, *19*, 1900174. doi:10.1002/pmic.201900174.
- 1224 229. Mantsiou, A.; Makridakis, M.; Fasoulakis, K.; Katafigiotis, I.; Constantinides, C.A.; Zoidakis,  
1225 J.; Roubelakis, M.G.; Vlahou, A.; Lygirou, V. Proteomics analysis of formalin fixed paraffin  
1226 embedded tissues in the investigation of prostate cancer. *Journal of Proteome Research* **2019**, *in press*.  
1227 doi:10.1021/acs.jproteome.9b00587.
- 1228 230. Turiák, L.; Ozohanics, O.; Tóth, G.; Ács, A.; Ágnes Révész.; Vékey, K.; Telekes, A.; Drahos, L. High  
1229 sensitivity proteomics of prostate cancer tissue microarrays to discriminate between healthy and cancerous  
1230 tissue. *Journal of Proteomics* **2019**, *197*, 82–91. doi:10.1016/j.jprot.2018.11.009.
- 1231 231. Zhou, B.; Yan, Y.; Wang, Y.; You, S.; Freeman, M.R.; Yang, W. Quantitative proteomic analysis of prostate  
1232 tissue specimens identifies deregulated protein complexes in primary prostate cancer. *Clinical Proteomics*  
1233 **2019**, *16*, 15. doi:10.1186/s12014-019-9236-2.
- 1234 232. Kwon, O.K.; Ha, Y.S.; Na, A.Y.; Chun, S.Y.; Kwon, T.G.; Lee, J.N.; Lee, S. Identification of novel prognosis  
1235 and prediction markers in advanced prostate cancer tissues based on quantitative proteomics. *Cancer*  
1236 *Genomics - Proteomics* **2020**, *17*, 195–208. doi:10.21873/cgp.20180.
- 1237 233. Sun, R.; Hunter, C.; Chen, C.; Ge, W.; Morrice, N.; Liang, S.; Zhu, T.; Yuan, C.; Ruan, G.; Zhang, Q.; Cai, X.;  
1238 Yu, X.; Chen, L.; Dai, S.; Luan, Z.; Aebersold, R.; Zhu, Y.; Guo, T. Accelerated protein biomarker discovery  
1239 from FFPE tissue samples using single-shot, short gradient microflow SWATH MS. *Journal of Proteome*  
1240 *Research* **2020**, *in press*. doi:10.1021/acs.jproteome.9b00671.
- 1241 234. Zhu, T.; Zhu, Y.; Xuan, Y.; Gao, H.; Cai, X.; Piersma, S.R.; Pham, T.V.; Schelfhorst, T.; Goeij De Haas, R.R.;  
1242 Bijnsdorp, I.V.; Sun, R.; Yue, L.; Ruan, G.; Zhang, Q.; Hu, M.; Zhou, Y.; Van Houdt, W.J.; Lelarge, T.; Cloos,  
1243 J.; Wojtuszkiewicz, A.; Koppers-Lalic, D.; Böttger, F.; Scheepbouwer, C.; Brakenhoff, R.; van Leenders, G.;  
1244 Ijzermans, J.N.; Martens, J.; Steenbergen, R.; Grieken, N.; Selvarajan, S.; Mantoo, S.; Lee, S.S.; Yi Yeow,  
1245 S.J.; Alkaff, S.M.F.; Xiang, N.; Sun, Y.; Yi, X.; Dai, S.; Liu, W.; Lu, T.; Wu, Z.; Liang, X.; Wang, M.; Shao,  
1246 Y.; Zheng, X.; Xu, K.; Yang, Q.; Meng, Y.; Lu, C.; Zhu, J.; Zheng, J.; Wang, B.; Lou, S.; Dai, Y.; Xu, C.; Yu,  
1247 C.; Ying, H.; Lim, T.K.h.; Wu, J.; Gao, X.; Luan, Z.; Teng, X.; Wu, P.; Huang, S.; Tao, Z.; Iyer, N.G.; Zhou,  
1248 S.; Shao, W.; Lam, H.; Ma, D.; Ji, J.; Kon, O.L.; Zheng, S.; Aebersold, R.; Jimenez, C.R.; Guo, T. DPHL:  
1249 A pan-human protein mass spectrometry library for robust biomarker discovery. *bioRxiv* **2020**, *preprint*.  
1250 doi:10.1101/2020.02.03.931329.
- 1251 235. Amend, J.P.; LaRowe, D.E.; McCollom, T.M.; Shock, E.L. The energetics of organic synthesis inside and  
1252 outside the cell. *Philosophical Transactions of the Royal Society, B: Biological Sciences* **2013**, *368*, 20120255.  
1253 doi:10.1098/rstb.2012.0255.
- 1254 236. Dick, J.M.; Shock, E.L. Calculation of the relative chemical stabilities of proteins as a function of temperature  
1255 and redox chemistry in a hot spring. *PLoS One* **2011**, *6*, e22782. doi:10.1371/journal.pone.0022782.
- 1256 237. Dick, J.M. Average oxidation state of carbon in proteins. *Journal of the Royal Society Interface* **2014**,  
1257 *11*, 20131095. doi:10.1098/rsif.2013.1095.
- 1258 238. Bolker, B.M. *Ecological Models and Data in R*; Princeton University Press: Princeton, NJ, 2008.
- 1259 239. Venables, W.N.; Ripley, B.D. *Modern Applied Statistics with S*, 4th ed.; Springer: New York, 2002.  
1260 <http://www.stats.ox.ac.uk/pub/MASS4>, doi:10.1007/978-0-387-21706-2.

- 1261 240. Trigou, A.S.; Pearson, R.B.; Papenfuss, A.T.; Goode, D.L. Altered interactions between unicellular and  
1262 multicellular genes drive hallmarks of transformation in a diverse range of solid tumors. *Proceedings of the*  
1263 *National Academy of Sciences* **2017**, *114*, 6406–6411. doi:10.1073/pnas.1617743114.
- 1264 241. Liebeskind, B.J.; McWhite, C.D.; Marcotte, E.M. Towards consensus gene ages. *Genome Biology and*  
1265 *Evolution* **2016**, *8*, 1812–1823. doi:10.1093/gbe/evw113.
- 1266 242. R Core Team. *R: A Language and Environment for Statistical Computing*. R Foundation for Statistical  
1267 Computing, Vienna, Austria, 2020. <https://www.R-project.org>.
- 1268 243. National Cancer Institute. TCGA Study Abbreviations. <https://gdc.cancer.gov/resources-tcga-users/tcga-code-tables/tcga-stu>  
1269 last accessed on 2020-01-30, 2018.
- 1270 244. Uhlén, M.; Fagerberg, L.; Hallström, B.M.; Lindskog, C.; Oksvold, P.; Mardinoglu, A.; Sivertsson, Å.; Kampf,  
1271 C.; Sjöstedt, E.; Asplund, A.; Olsson, I.; Edlund, K.; Lundberg, E.; Navani, S.; Szgyarto, C.A.K.; Odeberg, J.;  
1272 Djureinovic, D.; Takanen, J.O.; Hober, S.; Alm, T.; Edqvist, P.H.; Berling, H.; Tegel, H.; Mulder, J.; Rockberg,  
1273 J.; Nilsson, P.; Schwenk, J.M.; Hamsten, M.; von Feilitzen, K.; Forsberg, M.; Persson, L.; Johansson, F.;  
1274 Zwahlen, M.; von Heijne, G.; Nielsen, J.; Pontén, F. Tissue-based map of the human proteome. *Science*  
1275 **2015**, *347*, 1260419. doi:10.1126/science.1260419.
- 1276 245. Tang, Z.; Kang, B.; Li, C.; Chen, T.; Zhang, Z. GEPIA2: An enhanced web server for large-scale expression  
1277 profiling and interactive analysis. *Nucleic Acids Research* **2019**, *47*, W556–W560. doi:10.1093/nar/gkz430.
- 1278 246. Goldman, M.; Craft, B.; Hastie, M.; Repceka, K.; McDade, F.; Kamath, A.; Banerjee, A.; Luo, Y.; Rogers, D.;  
1279 Brooks, A.N.; Zhu, J.; Haussler, D. The UCSC Xena platform for public and private cancer genomics data  
1280 visualization and interpretation. *bioRxiv* **2019**, preprint. doi:10.1101/326470.
- 1281 247. GTEx Consortium. Genetic effects on gene expression across human tissues. *Nature* **2017**, *550*, 204–213.  
1282 doi:10.1038/nature24277.
- 1283 248. The Cancer Genome Atlas Research Network.; Weinstein, J.N.; Collisson, E.A.; Mills, G.B.; Shaw, K.R.M.;  
1284 Ozenberger, B.A.; Ellrott, K.; Sander, I.S.C.; Stuart, J.M. The Cancer Genome Atlas Pan-Cancer analysis  
1285 project. *Nature Genetics* **2013**, *45*, 1113–1120. doi:10.1038/ng.2764.
- 1286 249. Uhlen, M.; Zhang, C.; Lee, S.; Sjöstedt, E.; Fagerberg, L.; Bidkhor, G.; Benfeitas, R.; Arif, M.; Liu, Z.; Edfors,  
1287 F.; Sanli, K.; von Feilitzen, K.; Oksvold, P.; Lundberg, E.; Hober, S.; Nilsson, P.; Mattsson, J.; Schwenk,  
1288 J.M.; Brunnström, H.; Glimelius, B.; Sjöblom, T.; Edqvist, P.H.; Djureinovic, D.; Mücke, P.; Lindskog,  
1289 C.; Mardinoglu, A.; Pontén, F. A pathology atlas of the human cancer transcriptome. *Science* **2017**,  
1290 *357*, eaan2507. doi:10.1126/science.aan2507.
- 1291 250. Chen, G.; Gharib, T.G.; Huang, C.C.; Taylor, J.M.G.; Misek, D.E.; Kardia, S.L.R.; Giordano, T.J.; Iannettoni,  
1292 M.D.; Orringer, M.B.; Hanash, S.M.; Beer, D.G. Discordant protein and mRNA expression in lung  
1293 adenocarcinomas. *Molecular & Cellular Proteomics* **2002**, *1*, 304–313. doi:10.1074/mcp.M200008-MCP200.
- 1294 251. Greenbaum, D.; Colangelo, C.; Williams, K.; Gerstein, M. Comparing protein abundance and mRNA  
1295 expression levels on a genomic scale. *Genome Biology* **2003**, *4*, 117. doi:10.1186/gb-2003-4-9-117.
- 1296 252. Zhang, Y.J.; Zhu, C.; Ding, Y.; Yan, Z.W.; Li, G.H.; Lan, Y.; Wen, J.F.; Chen, B. Subcellular stoichiogenomics  
1297 reveal cell evolution and electrostatic interaction mechanisms in cytoskeleton. *BMC Genomics* **2018**, *19*, 469.  
1298 doi:10.1186/s12864-018-4845-0.
- 1299 253. Vohra, R.; Park, J.; Wang, Y.N.; Gravelle, K.; Whang, S.; Hwang, J.H.; Lee, D. Evaluation of  
1300 pancreatic tumor development in *KPC* mice using multi-parametric MRI. *Cancer Imaging* **2018**, *18*, 41.  
1301 doi:10.1186/s40644-018-0172-6.
- 1302 254. Genina, E.A.; Bashkatov, A.N.; Tuchina, D.K.; (Timoshina), P.A.D.; Navolokin, N.; Shirokov, A.;  
1303 Khorovodov, A.; Terskov, A.; Klimova, M.; Mamedova, A.; Blokhina, I.; Agranovich, I.; Zinchenko,  
1304 E.; Semyachkina-Glushkovskaya, O.V.; Tuchin, V.V. Optical properties of brain tissues at the different  
1305 stages of glioma development in rats: pilot study. *Biomedical Optics Express* **2019**, *10*, 5182–5197.  
1306 doi:10.1364/BOE.10.005182.
- 1307 255. Ali, J.H.; Wang, W.B.; Zevallos, M.; Alfano, R.R. Near infrared spectroscopy and imaging to probe  
1308 differences in water content in normal and cancer human prostate tissues. *Technology in Cancer Research &*  
1309 *Treatment* **2004**, *3*, 491–497. doi:10.1177/153303460400300510.
- 1310 256. Parker, C.; Milosevic, M.; Toi, A.; Sweet, J.; Panzarella, T.; Bristow, R.; Catton, C.; Catton, P.; Crook, J.;  
1311 Gospodarowicz, M.; McLean, M.; Warde, P.; Hill, R.P. Polarographic electrode study of tumor oxygenation  
1312 in clinically localized prostate cancer. *International Journal of Radiation Oncology\*Biophysics\*Physics* **2004**,  
1313 *58*, 750–757. doi:10.1016/S0360-3016(03)01621-3.

- 1314 257. Eidelman, E.; Twum-Ampofo, J.; Ansari, J.; Siddiqui, M.M. The metabolic phenotype of prostate cancer.  
1315 *Frontiers in Oncology* **2017**, *7*, 131. doi:10.3389/fonc.2017.00131.
- 1316 258. Hochachka, P.; Rupert, J.; Goldenberg, L.; Gleave, M.; Kozlowski, P. Going malignant: The hypoxia-cancer  
1317 connection in the prostate. *Bioessays* **2002**, *24*, 749–757. doi:10.1002/bies.10131.
- 1318 259. Zhou, J.X.; Cisneros, L.; Knijnenburg, T.; Trachana, K.; Davies, P.; Huang, S. Phylostratigraphic analysis of  
1319 tumor and developmental transcriptomes reveals relationship between oncogenesis, phylogenesis and  
1320 ontogenesis. *Convergent Science Physical Oncology* **2018**, *4*, 025002. doi:10.1088/2057-1739/aab1b0.
- 1321 260. Brocchieri, L.; Karlin, S. Protein length in eukaryotic and prokaryotic proteomes. *Nucleic Acids Research*  
1322 **2005**, *33*, 3390–3400. doi:10.1093/nar/gki615.
- 1323 261. Moyers, B.A.; Zhang, J. Further simulations and analyses demonstrate open problems of phylostratigraphy.  
1324 *Genome Biology and Evolution* **2017**, *9*, 1519–1527. doi:10.1093/gbe/evx109.
- 1325 262. Yin, Y.; Li, B.; Mou, K.; Khan, M.T.; Kaushik, A.C.; Wei, D.; Zhang, Y.J. Stoichioproteomics reveal  
1326 oxygen usage bias, key proteins and pathways in glioma. *BMC Medical Genomics* **2019**, *12*, 125.  
1327 doi:10.1186/s12920-019-0571-y.
- 1328 263. Zuo, X.; Li, B.; Zhu, C.; Yan, Z.W.; Li, M.; Wang, X.; Zhang, Y.J. Stoichiogenomics reveal oxygen  
1329 usage bias, key proteins and pathways associated with stomach cancer. *Scientific Reports* **2019**, *9*, 11344.  
1330 doi:10.1038/s41598-019-47533-6.
- 1331 264. Harris, B.H.L.; Barberis, A.; West, C.M.L.; Buffa, F.M. Gene expression signatures as biomarkers of tumour  
1332 hypoxia. *Clinical Oncology* **2015**, *27*, 547–560. doi:10.1016/j.clon.2015.07.004.
- 1333 265. Bhandari, V.; Hoey, C.; Liu, L.Y.; Lalonde, E.; Ray, J.; Livingstone, J.; Lesurf, R.; Shiah, Y.J.; Vujcic, T.; Huang,  
1334 X.; Espiritu, S.M.G.; Heisler, L.E.; Yousif, F.; Huang, V.; Yamaguchi, T.N.; Yao, C.Q.; Sabelnykova, V.Y.;  
1335 Fraser, M.; Chua, M.L.K.; van der Kwast, T.; Liu, S.K.; Boutros, P.C.; Bristow, R.G. Molecular landmarks of  
1336 tumor hypoxia across cancer types. *Nature Genetics* **2019**, *51*, 308–318. doi:10.1038/s41588-018-0318-2.
- 1337 266. Baudouin-Cornu, P.; Thomas, D. Oxygen at life's boundaries. *Nature* **2007**, *445*, 35–36.  
1338 doi:10.1038/nature05521.
- 1339 267. Dick, J.M. Calculation of the relative metastabilities of proteins in subcellular compartments of  
1340 *Saccharomyces cerevisiae*. *BMC Systems Biology* **2009**, *3*, 75. doi:10.1186/1752-0509-3-75.
- 1341 268. Beall, P.T. States of water in biological systems. *Cryobiology* **1983**, *20*, 324–334.  
1342 doi:10.1016/0011-2240(83)90021-4.
- 1343 269. Sun, Q.; He, Y.; Liu, K.; Fan, S.; Parrott, E.P.J.; Pickwell-MacPherson, E. Recent advances in terahertz  
1344 technology for biomedical applications. *Quantitative Imaging in Medicine and Surgery* **2017**, *7*, 345–355.  
1345 doi:10.21037/qims.2017.06.02.
- 1346 270. Tsai, H.J.; Nelliat, A.R.; Choudhury, M.I.; Kucharavy, A.; Bradford, W.D.; Cook, M.E.; Kim, J.; Mair, D.B.;  
1347 Sun, S.X.; Schatz, M.C.; Li, R. Hypo-osmotic-like stress underlies general cellular defects of aneuploidy.  
1348 *Nature* **2019**, *570*, 117–121. doi:10.1038/s41586-019-1187-2.
- 1349 271. Gasch, A.P.; Spellman, P.T.; Kao, C.M.; Carmel-Harel, O.; Eisen, M.B.; Storz, G.; Botstein, D.; Brown, P.O.  
1350 Genomic expression programs in the response of yeast cells to environmental changes. *Molecular Biology of*  
1351 *the Cell* **2000**, *11*, 4241–4257. doi:10.1091/mbc.11.12.4241.
- 1352 272. Yang, L.; Yurkovich, J.T.; Lloyd, C.J.; Ebrahim, A.; Saunders, M.A.; Palsson, B.O. Principles of proteome  
1353 allocation are revealed using proteomic data and genome-scale models. *Scientific Reports* **2016**, *6*, 36734.  
1354 doi:10.1038/srep36734.
- 1355 273. Karlin, S.; Brendel, V. Chance and statistical significance in protein and DNA sequence analysis. *Science*  
1356 **1992**, *257*, 39–49. doi:10.1126/science.1621093.
- 1357 274. Gunde-Cimerman, N.; Plemenitaš, A.; Oren, A. Strategies of adaptation of microorganisms of the  
1358 three domains of life to high salt concentrations. *FEMS Microbiology Reviews* **2018**, *42*, 353–375.  
1359 doi:10.1093/femsre/fuy009.
- 1360 275. Record, Jr., M.T.; Courtenay, E.S.; Cayley, D.S.; Guttman, H.J. Responses of *E. coli* to osmotic stress: Large  
1361 changes in amounts of cytoplasmic solutes and water. *Trends in Biochemical Sciences* **1998**, *23*, 143–148.  
1362 doi:10.1016/S0968-0004(98)01196-7.
- 1363 276. Staunton, J.R.; So, W.Y.; Paul, C.D.; Tanner, K. High-frequency microrheology in 3D reveals mismatch  
1364 between cytoskeletal and extracellular matrix mechanics. *Proceedings of the National Academy of Sciences*  
1365 **2019**, *116*, 14448–14455. doi:10.1073/pnas.1814271116.

- 1366 277. Acland, M.; Mittal, P.; Lokman, N.A.; Klingler-Hoffmann, M.; Oehler, M.K.; Hoffmann, P. Mass  
1367 spectrometry analyses of multicellular tumor spheroids. *Proteomics: Clinical Applications* **2018**, *12*, 1700124.  
1368 doi:10.1002/prca.201700124.
- 1369 278. Monnier, S.; Delarue, M.; Brunel, B.; Dolega, M.E.; Delon, A.; Cappello, G. Effect of an osmotic stress on  
1370 multicellular aggregates. *Methods* **2016**, *94*, 114–119. doi:10.1016/j.ymeth.2015.07.009.
- 1371 279. Jung, H.J.; Park, J.Y.; Jeon, H.S.; Kwon, T.H. Aquaporin-5: A marker protein for proliferation and migration  
1372 of human breast cancer cells. *PLOS One* **2011**, *6*, e28492. doi:10.1371/journal.pone.0028492.
- 1373 280. Havard, M.; Dautry, F.; Tchénio, T. A dormant state modulated by osmotic pressure controls clonogenicity  
1374 of prostate cancer cells. *Journal of Biological Chemistry* **2011**, *286*, 44177–44186. doi:10.1074/jbc.M111.262709.
- 1375 281. Schliess, F.; Reinehr, R.; Häussinger, D. Osmosensing and signaling in the regulation of mammalian cell  
1376 function. *FEBS Journal* **2007**, *274*, 5799–5803. doi:10.1111/j.1742-4658.2007.06100.x.
- 1377 282. Marakhova, I.; Yurinskaya, V.; Aksenov, N.; Zenin, V.; Shatrova, A.; Vereninov, A. Intracellular K<sup>+</sup> and  
1378 water content in human blood lymphocytes during transition from quiescence to proliferation. *Scientific  
1379 Reports* **2019**, *9*, 16253. doi:10.1038/s41598-019-52571-1.
- 1380 283. Hanahan, D.; Weinberg, R.A. Hallmarks of cancer: The next generation. *Cell* **2011**, *144*, 646–674.  
1381 doi:10.1016/j.cell.2011.02.013.
- 1382 284. Gromov, P.; Moreira, J.M.; Gromova, I. Proteomic analysis of tissue samples in translational breast cancer  
1383 research. *Expert Review of Proteomics* **2014**, *11*, 285–302. doi:10.1586/14789450.2014.899469.
- 1384 285. Fujii, K.; Nakamura, H.; Nishimura, T. Recent mass spectrometry-based proteomics for biomarker  
1385 discovery in lung cancer, COPD, and asthma. *Expert Review of Proteomics* **2017**, *14*, 373–386.  
1386 doi:10.1080/14789450.2017.1304215.
- 1387 286. Calabrese, F.; Lunardi, F.; Pezzuto, F.; Fortarezza, F.; Vuljan, S.E.; Marquette, C.; Hofman, P. Are there new  
1388 biomarkers in tissue and liquid biopsies for the early detection of non-small cell lung cancer? *Journal of  
1389 Clinical Medicine* **2019**, *8*, 414. doi:10.3390/jcm8030414.
- 1390 287. Bolstad, B.; Irizarry, R.; Åstrand, M.; Speed, T. A comparison of normalization methods for high  
1391 density oligonucleotide array data based on variance and bias. *Bioinformatics* **2003**, *19*, 185–193.  
1392 doi:10.1093/bioinformatics/19.2.185.
- 1393 288. Huang, H.; McGarvey, P.B.; Suzek, B.E.; Mazumder, R.; Zhang, J.; Chen, Y.; Wu, C.H. A comprehensive  
1394 protein-centric ID mapping service for molecular data integration. *Bioinformatics* **2011**, *27*, 1190–1191.  
1395 doi:10.1093/bioinformatics/btr101.
- 1396 289. Dick, J.M. CHNOSZ: Thermodynamic calculations and diagrams for geochemistry. *Frontiers in Earth  
1397 Science* **2019**, *7*, 180. doi:10.3389/feart.2019.00180.
- 1398 290. The Human Protein Atlas. Dictionary: Pathology Overview.  
1399 <https://www.proteinatlas.org/learn/dictionary/pathology> last accessed on 2020-01-31, 2019.
- 1400 291. GEPIA2. Dataset Sources. <http://gepia2.cancer-pku.cn/#dataset> last accessed on 2020-01-31, 2019.
- 1401 292. Liebeskind, B.; McWhite, C.D.; Hines, K. Gene-Ages v1.0. <https://doi.org/10.5281/zenodo.51708>, 2016.
- 1402 293. Dick, J.M. canprot 1.0.0. <https://doi.org/10.5281/zenodo.3820154>, 2020.
- 1403 294. Dick, J.M. JMDplots 1.2.2. <https://doi.org/10.5281/zenodo.3824121>, 2020.
